# Supplementary material
Source: PubMed Central journal article supplement (PMC7063545)
Supplement: jamapediatr-174-e196306-s002.pdf [file jamapediatr-174-e196306-s002.pdf]

**ECHO Autism  
Study Protocol**

**Version Date: October 25, 2016  
Version Number: 3**

**Supported by:**  
Heath Resources and Services Administration  
Grant Number: UA3MC11054

1  
2  
3  
4  
5  
6  
7  
8  
9  
10  
11  
12  
13  
14

## 15 **PROTOCOL SYNOPSIS**

16

### 17 **Study Title**

18

19 *ECHO Autism*

20

### 21 **Version Number**

22 3

23

### 24 **Rationale for the Study**

25

26 ASD is associated with significant impairments in social, communication and behavioral domains and medical and  
27 psychiatric comorbidities [1-3]. Unmanaged comorbid conditions contribute to increased stress and burden for  
28 families [4-5]. Children with ASD have increased risk for unmet healthcare needs, which is exacerbated among  
29 underserved populations [6-8]. Individuals in rural areas face socioeconomic and geographic barriers to accessing  
30 health care, including high rates of poverty [9]. They are more likely to lack health insurance [10]. Rural areas  
31 have significant shortages of specialists, necessitating long distance travel for families to access services [10].  
32 Rural children have higher rates of unmet medical and dental needs and of emergency department visits than do  
33 non-rural populations [11].

34

35 With increasing prevalence of ASD, diagnostic and treatment demands far exceed the capacity of specialty centers  
36 [12]. Early identification, referral and effective treatment are essential for enhancing outcomes, yet children with  
37 ASD face delays in diagnosis [13]. Although PCPs provide immediate and community-based care for children,  
38 they often feel ill-equipped to care for children with ASD [14-15]. Children with ASD experience co-occurring  
39 conditions that PCPs could manage, most notably sleep problems and constipation [3, 16-17]. However, PCPs  
40 report lack of knowledge and confidence in treating children with ASD, with resulting unmet healthcare needs [14-  
41 15]. PCPs also may lack the knowledge to manage ongoing psychotropic medication use. Lack of PCP comfort  
42 caring for children with ASD likely contributes to higher rates and duration of hospitalizations, greater  
43 expenditures, and greater use of psychotropic medications in children with ASD [18-21]. Thus, there is a critical  
44 need to improve early identification of ASD by PCPs and to enhance PCP effectiveness in managing sleep,  
45 constipation, psychotropic medications and other co-morbidities for children with ASD.

46

### 47 **Study Design**

48

49 A cluster-randomized design will be used, with sequential, staggered roll-out of the ECHO Autism intervention to  
50 5 clusters of participants over a 1 year period. This design was chosen to maximize our ability to determine  
51 effectiveness of the intervention while minimizing potential contamination across groups and addressing potential  
52 ethical concerns. First, it would be problematic to randomize at the level of individual participants due to potential  
53 contamination across groups. Second, the staggered roll-out allows for comparison of each cluster to  
54 contemporaneous control groups as well as to its own baseline. Lastly, there will be a large benefit from the  
55 intervention for the participants themselves and we expect a large benefit for the patient populations that they  
56 serve as well. Moreover, for the actual participants (PCPs) there is no potential harm (as they receive CME credits  
57 for participation). Therefore, randomization of participants to never receiving the intervention would be  
58 inappropriate. To enable a rigorous assessment of the effect of the ECHO intervention, we are randomizing  
59 different centers (and the participants linked to each center) to starting at different times during the study and will  
60 be using multiple data collection points under baseline, ECHO and follow-up conditions.

61

### 62 **Study Objectives and Endpoints**

63

64 ***Primary Objective:*** To determine whether participation in a collaborative telehealth intervention will result in  
65 improved learning, clinical practice behavior and efficacy among primary care providers (PCPs).

66

67 **Hypothesis 1:** Following participation in ECHO Autism, PCPs will demonstrate significant  
68 improvements in ASD knowledge as assessed by pre- to post-intervention knowledge tests in ASD  
69 screening and identification and assessment and treatment of medical co-morbidities;

70  
71 **Hypothesis 2:** Following participation in ECHO Autism, PCPs will demonstrate significant  
72 improvements in clinical practice/behavior as assessed by pre- to post-intervention chart reviews in ASD  
73 screening (co-primary outcome) and treatment of medical co-morbidities, in particular, sleep problems  
74 and constipation (co-primary outcome).  
75

76 **Hypothesis 3:** Following participation in ECHO Autism, PCPs will demonstrate significant  
77 improvements in self-efficacy in ASD screening and identification and treatment of medical co-  
78 morbidities.  
79

## 80 **Intervention and Duration**

81  
82 As noted above, a cluster-randomized design will be used, with sequential, staggered roll-out of the ECHO Autism  
83 intervention to 5 clusters over a 1 year period. The intervention will be delivered at 10 ECHO Autism Hubs,  
84 which will be randomly assigned to one of 5 clusters. Cluster assignment will determine the timing of the  
85 intervention start-date for each ECHO Autism Hub. Each ECHO Autism Hub will deliver the intervention to 15  
86 PCP participants (for a total of 150 participants).  
87

88 Each ECHO Autism Hub will be comprised of a team of up to 5 autism specialists (Physician/Autism Medical  
89 Specialist, Psychologist, Family Navigator, Dietician, and Parent Expert). The ECHO Autism Leadership team at  
90 the University of Missouri (MU) and the Replication Support Team at the University of New Mexico will train  
91 each ECHO Autism Hub in delivery and implementation of the intervention.  
92

93 During the intervention phase, each ECHO Autism Hub team will provide twice-monthly 2-hour ECHO Autism  
94 Clinics for 15 PCP participants during a 6-month period. Each Clinic will utilize high quality, secure video  
95 conferencing technology to allow PCPs to interface with the ECHO Autism Hub team and all other participants,  
96 view documents, and view videos on screen (with minimal technological requirements for participants). The  
97 intervention will follow the protocol previously developed and tested by the ECHO Autism Leadership team.  
98 Based on this protocol, each ECHO Autism Clinic will include a didactic presentation, 2 to 3 PCP-generated case  
99 presentations, expert feedback and group discussion. Although the ECHO Clinic will include discussion of  
100 specific cases, no identifiable personal health information will be shared, individual patients will not be identified,  
101 and no direct patient care will be provided (PCP participants will maintain responsibility for care of their patients,  
102 but will develop new clinical skills through guided practice and collaborative learning). ECHO Autism didactic  
103 presentations will include use of AIR-P toolkits, guidelines, and algorithms to enhance medical care of children  
104 with ASD, with particular emphasis on identification/screening and management of co-morbid conditions. This  
105 combination of case-based learning, co-management with autism specialists, and didactic presentations provides  
106 multiple learning modalities for enhancing PCP knowledge and expertise.  
107

## 108 **Study Locations**

109  
110 The study will be implemented at 10 different ATN Sites (ECHO Autism Hubs): 15 PCP participants per ECHO  
111 Autism Hub will be recruited from the geographic region in which the ATN site is located.  
112

- 113 1. Children's Hospital of Philadelphia
- 114 2. Lurie Center for Autism
- 115 3. University of Pittsburgh Medical Center
- 116 4. University of Rochester
- 117 5. Cincinnati Children's Hospital Medical Center
- 118 6. Nationwide Children's Hospital
- 119 7. Arkansas Children's Hospital/UAMS
- 120 8. Vanderbilt University Medical Center
- 121 9. The Center for Autism & Neurodevelopmental Disorders at UC Irvine

122 10. Toronto ATN Site (Holland Bloorview Kids Rehab)

123

124 **Number of Planned Subjects**

125

126 15 PCP participants from each ECHO Autism Hub will be enrolled (total enrollment = 150 participants)

127

128 **Study Population**

129

130 Participants will include primary care providers (PCPs) who provide care to children, whose patient populations  
131 are at least 50% underserved.

132

133 **Assessment Groups**

134

135 As noted above, a cluster-randomized design will be used, with sequential, staggered roll-out of the ECHO Autism  
136 intervention to 5 clusters over a 1 year period. The intervention will be delivered at 10 ECHO Autism Hubs, two  
137 being randomly assigned to each of the 5 clusters. Cluster assignment will determine the timing of the  
138 intervention start-date for each ECHO Autism Hub. Each ECHO Autism Hub will deliver the intervention to 15  
139 PCP participants (for a total of 150 total participants). Participants will be assessed at four time points (as  
140 described below).

141

142 **Duration of Assessment and Follow-up**

143

144 Each PCP participant will complete a battery of assessments at four time points: Baseline/Pre-Intervention (T1),  
145 Mid-Intervention (T2), Post-Intervention (T3), and Follow-up (T4). The duration of the ECHO intervention will  
146 be 6 months, and the interval between each assessment point will be 3 months. The timeline of intervention and  
147 assessments by cohort is shown below:

148

|                 | 12/1/2016 | 3 Months    | 3/1/2017  | 3 months    | 6/1/2017  | 3 months    | 9/1/2017  | 3 months    | 12/1/2017 | 3 months    | 3/1/2018  | 3 months    | 6/1/2018  | 3 months | 9/1/2018  |
|-----------------|-----------|-------------|-----------|-------------|-----------|-------------|-----------|-------------|-----------|-------------|-----------|-------------|-----------|----------|-----------|
| <b>Cohort 1</b> | <b>T</b>  | <b>ECHO</b> | <b>T2</b> | <b>ECHO</b> | <b>T3</b> |             | <b>T4</b> |             |           |             |           |             |           |          |           |
| <b>Cohort 2</b> |           |             | <b>T1</b> | <b>ECHO</b> | <b>T2</b> | <b>ECHO</b> | <b>T3</b> |             | <b>T4</b> |             |           |             |           |          |           |
| <b>Cohort 3</b> |           |             |           |             | <b>T1</b> | <b>ECHO</b> | <b>T2</b> | <b>ECHO</b> | <b>T3</b> |             | <b>T4</b> |             |           |          |           |
| <b>Cohort 4</b> |           |             |           |             |           |             | <b>T1</b> | <b>ECHO</b> | <b>T2</b> | <b>ECHO</b> | <b>T3</b> |             | <b>T4</b> |          |           |
| <b>Cohort 5</b> |           |             |           |             |           |             |           |             | <b>T1</b> | <b>ECHO</b> | <b>T2</b> | <b>ECHO</b> | <b>T3</b> |          | <b>T4</b> |

149

150 **Measures**

151

152 Primary outcome measures include: ASD knowledge, clinical practice/behavior and self-efficacy. ASD knowledge  
153 will be assessed at all timepoints using a 33-item test developed specifically for this study. Clinical  
154 practice/behavior will be assessed at all timepoints by chart review of a subset of charts from each PCP's practice.  
155 Self-efficacy in ASD screening and identification and treatment of medical co-morbidities will be assessed at all  
156 timepoints using a 57-item questionnaire that was developed for an ECHO Autism pilot study.

157

158 Secondary measures include: demographic and practice information, satisfaction, perceived barriers, participation,  
159 and a precise schedule of ECHO topics and dates of PCP chart reviews.

160

161

162

163

164  
165  
166  
167

### **Glossary of Abbreviations**

|              |                                                         |
|--------------|---------------------------------------------------------|
| <b>AAP</b>   | American Academy of Pediatrics                          |
| <b>AIR-P</b> | Autism Intervention Research Network on Physical Health |
| <b>ASD</b>   | Autism Spectrum Disorder                                |
| <b>ATN</b>   | Autism Treatment Network                                |
| <b>DCC</b>   | Data Coordinating Center                                |
| <b>ECHO</b>  | Extension for Community Healthcare Outcomes             |
| <b>HIPAA</b> | Health Insurance Portability and Accountability Act     |
| <b>HRSA</b>  | Health Resources and Services Administration            |
| <b>IRB</b>   | Institutional Review Board                              |
| <b>OHRP</b>  | Office for Human Research Protections                   |
| <b>PI</b>    | Principal Investigator                                  |
| <b>SID</b>   | Study Identification Number                             |
| <b>UNM</b>   | University of New Mexico                                |

## ETHICS/PROTECTION OF HUMAN SUBJECTS

168

### *Institutional Review Board (IRB)*

169

170 This protocol and the recruitment letter (Appendix B) and any subsequent modifications will be reviewed and  
 171 approved by the IRB or ethics committee responsible for oversight of the study. The recruitment letter will  
 172 describe the purpose of the study, the procedures to be followed, and the risks and benefits of participation. A  
 173 copy of the letter will be given to the participant, and this fact will be documented in the participant's record.  
 174

### *Ethical Conduct of Study*

175

176 This study will be conducted using good clinical practice (GCP), as delineated in *Guidance for Industry: E6 Good  
 177 Clinical Practice Consolidated Guidance*, and according to the criteria specified in this study protocol. Before  
 178 study initiation, the protocol and the informed consent documents will be reviewed and approved by an  
 179 appropriate IRB/REB. Any amendments to the protocol or to the consent materials must also be approved by the  
 180 AIR-P CCC, AIR-P DCC, and appropriate IRB before they are implemented.  
 181

182

183 Compliance with 42 CFR Part 93, Public Health Service (PHS) Policies on Scientific Misconduct is implicit in the  
 184 application for this proposal. The academic institutions participating in the ATN and this proposal have approved  
 185 assurances and required renewals on file with the Office of Research Integrity (ORI) and compliance with these  
 186 policies and procedures and the requirements of part 93 are in place. We understand and abide by the definitions  
 187 of research misconduct per PHS policies (fabrication, falsification, or plagiarism in proposing, performing, or  
 188 reviewing research, or in reporting research results).

188

### *Subject Information and Consent*

189

190 Participants will include 150 primary care providers. Inclusion/exclusion, recruitment, consent, and enrollment are  
 191 described in the sections below.  
 192

### *Subject Inclusion*

193

194 Inclusion criteria for PCP participants are as follows:

- 195 • Current practice as a primary care provider (PCP).
- 196 • Currently providing care for children.
- 197 • Professional training in: general pediatrics, family medicine, advanced practice nursing (i.e. nurse practitioner  
 198 or physician assistant).
- 199 • Active medical license in the state of practice.
- 200 • Patient population is at least 50% underserved.

201

202 Exclusion criteria are as follows:

- 203 • Not currently practicing as a primary care provider.
- 204 • Not currently providing care for children.
- 205 • Trainee status (e.g., medical student, intern, resident, or other pre-professional trainee).
- 206 • Subspecialist (e.g., psychiatrists, neurologists, developmental and behavioral pediatricians).
- 207 • Practicing within the same practice as another PCP Participant (i.e., only one PCP participant from any given  
 208 practice may be enrolled as a research participant in the study).\*

209

### *Study Modification/Discontinuation*

210

---

\* Providers who are not eligible to participate in the study, but who express interest in participating in ECHO Autism will be invited to join the Missouri ECHO Autism Clinic (an open-enrollment ECHO Clinic that does not currently include a research component).

211 The study may be modified or discontinued at any time by the IRB, HRSA, the AIR-P, the OHRP, or other  
212 government agencies as part of their duties to ensure that research subjects are protected.  
213

## BACKGROUND

### *Rationale*

214 ASD is associated with significant impairments in social, communication and behavioral domains and medical and  
215 psychiatric comorbidities [1-3]. Unmanaged comorbid conditions contribute to increased stress and burden for  
216 families [4-5]. Children with ASD have increased risk for unmet healthcare needs, which is exacerbated among  
217 underserved populations [6-8]. Individuals in rural areas face socioeconomic and geographic barriers to accessing  
218 health care, including high rates of poverty [9]. They are more likely to lack health insurance [10]. Rural areas  
219 have significant shortages of specialists, necessitating long distance travel for families to access services [10].  
220 Rural children have higher rates of unmet medical and dental needs and of emergency department visits than do  
221 non-rural populations [11].  
222

223  
224 With increasing prevalence of ASD, diagnostic and treatment demands far exceed the capacity of specialty centers  
225 [12]. Early identification, referral and effective treatment are essential for enhancing outcomes, yet children with  
226 ASD face delays in diagnosis [13]. Although PCPs provide immediate and community-based care for children,  
227 they often feel ill-equipped to care for children with ASD [14-15]. Children with ASD experience co-occurring  
228 conditions that PCPs could manage, most notably sleep problems and constipation [3, 16-17]. However, PCPs  
229 report lack of knowledge and confidence in treating children with ASD, with resulting unmet healthcare needs [14-  
230 15]. PCPs also may lack the knowledge to manage ongoing psychotropic medication use. Lack of PCP comfort  
231 caring for children with ASD likely contributes to higher rates and duration of hospitalizations, greater  
232 expenditures, and greater use of psychotropic medications in children with ASD [18-21]. Thus, there is a critical  
233 need to improve early identification of ASD by PCPs and to enhance PCP effectiveness in managing sleep,  
234 constipation, psychotropic medications and other co-morbidities for children with ASD.  
235

236 Extension for Community Healthcare Outcomes (ECHO) was designed to build local healthcare capacity and  
237 improve access to best practice care for minorities and underserved rural populations in New Mexico. ECHO  
238 represents an innovative telemedicine-based platform connecting local PCPs with specialists at academic medical  
239 centers during weekly ECHO clinics, and providing education in best-practice treatment protocols, case-based  
240 learning, and co-management [22]. The theoretical underpinnings of the model include well-established learning  
241 theories, all of which emphasize the need for collaborative learning, coaching, and mentorship from both experts and  
242 peers [23-26].  
243

244 By equipping community-based providers to provide best-practice care, the ECHO model disseminates academic  
245 and specialty knowledge directly into families' communities. Mainly used to date for adult chronic conditions in  
246 rural communities, it has proven particularly effective with underserved and culturally-diverse populations. ECHO  
247 accelerates the adoption of effective interventions, guidelines, tools and systems management approaches to  
248 community practice, helping patients to receive care in their own communities. The ECHO model has  
249 demonstrated effectiveness in improving both provider self-efficacy and patient outcomes for Hepatitis C (HCV),  
250 and has now expanded to address other complex medical conditions, including rheumatoid arthritis, chronic pain,  
251 HIV/AIDS, addiction, and psychiatric problems, with rapid expansion into other geographic areas [22, 27-28].  
252

### *Supporting Data*

253  
254 The results of an initial pilot study of the ECHO Autism intervention support its feasibility and effectiveness. The  
255 pilot project included development and implementation of the 6-month ECHO Autism curriculum, consisting of 2-  
256 hour clinics occurring twice per month, with a specific focus on 1) screening and identification of ASD symptoms  
257 and 2) management of medical and psychiatric comorbidities. Participants (n = 14 PCPs) completed measures of  
258 practice behavior and self-efficacy in screening and management of children with ASD at baseline (pre-test) and  
259 after 6 months of participation in ECHO Autism (post-test). The results revealed statistically significant pre- to  
260 post-test improvements in self-efficacy in all areas of ASD screening and management, in adherence to AAP  
261 autism screening guidelines, and in use of ASD-specific resources. Participants also reported high satisfaction  
262 with the program.

263

**Risks and Benefits**

264

**Risks**

265

266 There are minimal anticipated risks to PCPs for participation in the ECHO Autism intervention. The focus of the  
 267 intervention is on improving knowledge and practice behavior through education and mentorship of PCP  
 268 participants. No health-related or sensitive information about participants will be collected. Participant responses  
 269 and data collected during study assessments will be de-identified.

270

**Benefits**

271

272 Participants will receive a 6-month intervention focused in improving their own knowledge, confidence and  
 273 competence in managing children with ASD in their respective practices. Participants will receive direct benefits  
 274 in the form of knowledge gained and continuing medical education credit. Participants may also expect to benefit  
 275 from taking part of this research to the extent that they are contributing to the development and evaluation of new  
 276 training methods, and that the information learned will benefit other PCPs and the children they serve in the future.  
 277 Ultimately, the results of the study will benefit children with autism and their families by enhancing access to best-  
 278 practice medical care in local communities.

**OBJECTIVES**

**Study Objectives:** To determine whether participation in a collaborative telehealth intervention will result in improved learning, clinical practice behavior and efficacy among primary care providers (PCPs).

279

280 **Hypothesis 1:** Following participation in ECHO Autism, PCPs will demonstrate significant  
 281 improvements in ASD knowledge as assessed by pre- to post-intervention knowledge tests in ASD  
 282 screening and identification and assessment and treatment of medical co-morbidities.

283

284 **Hypothesis 2:** Following participation in ECHO Autism, PCPs will demonstrate significant  
 285 improvements in clinical practice/behavior as assessed by pre- to post-intervention chart reviews in ASD  
 286 screening (co-primary outcome) and treatment of medical co-morbidities, in particular, sleep problems  
 287 and constipation (co-primary outcome).

288

289 **Hypothesis 3:** Following participation in ECHO Autism, PCPs will demonstrate significant  
 290 improvements in self-efficacy in ASD screening and identification and treatment of medical co-  
 291 morbidities as assessed by pre- to post- intervention tests.

292

**Study Outcome Measures**

293

**Primary outcome measures**

294

295 1) **ASD Knowledge** will be assessed at T1, T2, T3, and T4 using a 33-item test developed specifically  
 296 for the current study. The test is detailed in section 8.

297

298 2) **Clinical Practice/Behavior** will be assessed at T1, T2, T3, and T4 by review of a subset of charts  
 299 from each PCP's practice. Five subsets of charts will be reviewed. The charts that will be reviewed  
 300 are detailed in section 8.

301

302 3) **Self-Efficacy** will be assessed at T1, T2, T3, and T4 using a questionnaire developed for a previous  
 303 ECHO Autism pilot study. The questionnaire is detailed in section 8.

304

**Secondary measures**

305



- 306 1) **Demographic and Practice Information** will be collected at T1 using a demographic questionnaire.  
 307 Providers will report the following information: age, gender, race, ethnicity, zip code of practice,  
 308 patient population (volume, patient characteristics), years of practice, provider type, and previous  
 309 training in ASD.  
 310
- 311 2) **Satisfaction** will be assessed at T3 using a 12-item survey developed for a previous ECHO Autism  
 312 pilot study. The survey includes 10 questions assessing overall satisfaction with participation in the  
 313 ECHO Autism clinic (rated on a 5-point Likert-type scale), and two questions asking for overall  
 314 comments and suggestions.  
 315
- 316 3) **Perceived Barriers** to caring for children with autism in primary care will be assessed at T1, T2, T3,  
 317 and T4 by participant response to an 11-item checklist.  
 318
- 319 4) **Participation** in each ECHO session for a PCP will be abstracted from the CME sign in sheets.  
 320
- 321 5) **Precise schedule** of ECHO topics and dates of PCP chart reviews will be collected and considered as  
 322 potential explanatory values for modeling outcomes, especially for the T2 assessment which occurs  
 323 during the ECHO intervention.  
 324

## STUDY DESIGN

### *Overall Study Design and Plan*

325  
 326 A cluster-randomized design will be used, with sequential, staggered roll-out of the ECHO Autism intervention to  
 327 5 clusters of participants over a 1 year period. This design was chosen to maximize our ability to determine  
 328 effectiveness of the intervention while minimizing potential contamination across groups and addressing potential  
 329 ethical concerns. First, it would be problematic to randomize at the level of individual participants due to potential  
 330 contamination across groups. Second, the staggered roll-out allows for comparison of each cluster to  
 331 contemporaneous control groups as well as to its own baseline. Lastly, because of the anticipated benefit of the  
 332 intervention for underserved populations, randomization of participants into a control group that does not receive  
 333 the intervention would be unethical. The chosen design addresses these concerns by allowing us to randomize at  
 334 the level of cohort (ECHO Autism Hubs), implement the intervention to cohorts in a stepwise manner, and test the  
 335 effectiveness of the intervention using multiple data collection points under both baseline and ECHO conditions.  
 336  
 337

|          | 12/1/2016 | 3 Months | 3/1/2017 | 3 months | 6/1/2017 | 3 months | 9/1/2017 | 3 months | 12/1/2017 | 3 months | 3/1/2018 | 3 months | 6/1/2018 | 3 months | 9/1/2018 |
|----------|-----------|----------|----------|----------|----------|----------|----------|----------|-----------|----------|----------|----------|----------|----------|----------|
| Cohort 1 | T         | ECHO     | T2       | ECHO     | T3       |          | T4       |          |           |          |          |          |          |          |          |
| Cohort 2 |           |          | T1       | ECHO     | T2       | ECHO     | T3       |          | T4        |          |          |          |          |          |          |
| Cohort 3 |           |          |          |          | T1       | ECHO     | T2       | ECHO     | T3        |          | T4       |          |          |          |          |
| Cohort 4 |           |          |          |          |          |          | T1       | ECHO     | T2        | ECHO     | T3       |          | T4       |          |          |
| Cohort 5 |           |          |          |          |          |          |          |          | T1        | ECHO     | T2       | ECHO     | T3       |          | T4       |

338

### *Study Centers*

339

340 The study will be implemented at 10 different ATN Sites (ECHO Autism Hubs): 15 PCP participants per ECHO  
 341 Autism Hub will be recruited from the geographic region in which the ATN site is located.  
 342

343

1. Children's Hospital of Philadelphia

- 344 2. Lurie Center for Autism  
 345 3. University of Pittsburgh Medical Center  
 346 4. University of Rochester  
 347 5. Cincinnati Children’s Hospital Medical Center  
 348 6. Nationwide Children’s Hospital  
 349 7. Arkansas Children's Hospital/UAMS  
 350 8. Vanderbilt University Medical Center  
 351 9. The Center for Autism & Neurodevelopmental Disorders at UC Irvine  
 352 10. Toronto ATN Site (Holland Bloorview Kids Rehab)  
 353

### ***Study Enrollment Procedures***

354

#### **Recruitment of Participants**

355

356 Each ECHO Autism Hub will utilize a number of different recruitment strategies to recruit 15 PCP participants  
 357 who meet inclusion criteria (as described previously). The Massachusetts League of Community Health Centers  
 358 will work closely with each ECHO Autism Hub to facilitate recruitment efforts. Each ECHO Autism Hub team  
 359 may generate a list of potential PCP practices based on publically available searchable databases. PCP practices  
 360 may meet federal designation in any of the following:

- 361 • Primary Care Health Professional Shortage Areas (PC-HPSAs)
- 362 • Medically Underserved Areas and Populations (based on the Index of Medical Underservice)
- 363 • Federally Qualified Health Centers (FQHCs)

364

365 PCP practices are not required to meet these federal designations in order to be eligible for the study.

366

367 ECHO Autism Hub staff may then contact potential physicians via a recruitment letter or email that includes a link  
 368 to ECHO Autism web-based resources. The letter can be followed by phone calls and/or face-to-face recruitment  
 369 strategies as appropriate. Once a PCP agrees to participate, study staff will re-evaluate eligibility prior to  
 370 consenting (based on inclusion/exclusion criteria described above).

371

372 Screening logs will be maintained to track recruitment efforts and results, including number of potentially eligible  
 373 participants contacted, number of interested participants, and results of initial screening (reasons for ineligibility,  
 374 reasons for nonparticipation of eligible participants).

375

376

377 Additional recruitment strategies may include:

- 378 • Attendance and/or presentations at local meetings such as the state chapters of the American Academy of  
 379 Pediatrics (AAP), American Academy of Family Physicians, and State Primary Care Associations  
 380 (FQHC).
- 381 • Social and traditional media posts
- 382 • Email recruitment through state-wide or regional primary care association listservs

383

#### **Consent and Assent**

384

385 A waiver of consent is being requested for the purpose of this study as this  
 386 research involves no more than minimal risk. The waiver will not adversely affect the  
 387 rights and welfare of the participants. Participants will be given a recruitment letter that outlines the research study  
 388 for their review. A copy of this document is included as Appendix B. Participants will provide consent by their  
 389 participation in the baseline/preintervention battery of assessments.

390

#### ***Study Duration***

391

392 As noted above, a cluster-randomized design will be used, with sequential, staggered roll-out of the ECHO Autism  
 393 intervention to 5 clusters over a 1 year period. The intervention will be delivered at 10 ECHO Autism Hubs, two  
 394 being randomly assigned to each of the 5 clusters. Cluster assignment will determine the timing of the  
 395 intervention start-date for each ECHO Autism Hub. Each ECHO Autism Hub will deliver the intervention to 15  
 396 PCP participants (for a total of 150 total participants). Participants will be assessed at four time points (as  
 397 described below).

#### 398 399 **Duration of Assessment and Follow-up**

400 Each PCP participant will complete a battery of assessments at four time points: Baseline/Pre-Intervention (T1),  
 401 Mid-Intervention (T2), Post-Intervention (T3), and Follow-up (T4). The duration of the ECHO intervention will  
 402 be 6 months, and the interval between each assessment point will be 3 months.

403

#### *Participant Remuneration*

404

405 Participants will receive \$100 after completion of each time point.

406

#### *Protocol Adherence*

407

408 All ECHO Autism Hub teams will adhere to the procedures outlined in the Protocol, and will also adhere to the  
 409 intervention implementation procedures described in the ECHO Autism Manual of Procedures throughout  
 410 implementation of the 6-month ECHO Autism intervention.

411

## **STUDY ENROLLMENT AND WITHDRAWAL**

### *Number of Study Subjects*

412

413 Participants will include 150 primary care providers. Inclusion/exclusion, recruitment, consent, and enrollment are  
 414 described in the sections below.

### *Inclusion and Exclusion Criteria*

415

#### **Subject Inclusion Criteria**

416

- 417 • Current practice as a primary care provider (PCP).
- 418 • Currently providing care for children.
- 419 • Professional training in: general pediatrics, family medicine, advance practice nursing (i.e. nurse practitioner  
 420 or physician assistant).
- 421 • Active medical license in the state of practice.
- 422 • Patient population is at least 50% underserved.

423

#### **Subject exclusion criteria**

424

- 425 • Trainee status (e.g., medical student, intern, resident, or other pre-professional trainee).
- 426 • Subspecialist (e.g., psychiatrists, neurologists, developmental and behavioral pediatricians).
- 427 • Practicing within the same practice as another PCP Participant (i.e., only one PCP participant from any given  
 practice may be enrolled as a research participant in the study).

### *Treatment Assignment Procedures*

428

#### **Randomization procedures**

429

430 The intervention will be delivered at 10 ECHO Autism Hubs, two being randomly assigned to each of the 5  
 431 clusters. Cluster assignment will determine the timing of the intervention start-date for each ECHO Autism Hub.  
 432 Each ECHO Autism Hub will deliver the intervention to 15 PCP participants (for a total of 150 participants).  
 433 Randomization of cluster assignment was completed by the DCC on 1/12/2016.

### Reasons for withdrawal

434  
435 Participation will be voluntary. Participants will not be withdrawn from the study unless they request to  
436 discontinue participation.  
437

### Handling of withdrawals

438  
439 Data from withdrawn participants will be stored with data from participants who complete the study. No further  
440 data will be collected from participants who have withdrawn, and participant decisions to withdraw will be noted in  
441 the data collection system.  
442

## STUDY INTERVENTIONS

### *Interventions, Administration and Duration*

443  
444 During the intervention phase, each ECHO Autism Hub team will provide twice-monthly 2-hour ECHO Autism  
445 Clinics for 15 PCP participants during a 6-month period. Each ECHO Autism Hub will be comprised of a team of  
446 up to 5 autism specialists (Physician/Autism Specialist, Psychologist, Family Navigator, Dietician, and Parent  
447 Expert).  
448

449 Each Clinic will utilize high quality, secure video conferencing technology to allow PCPs to interface with the  
450 ECHO Autism Hub team and all other participants, view documents, and view videos on screen (with minimal  
451 technological requirements for participants). The intervention will follow the protocol previously developed and  
452 tested by the ECHO Autism Leadership team. Based on this protocol, each ECHO Autism Clinic will include a  
453 didactic presentation, 2 to 3 PCP-generated case presentations, expert feedback, and group discussion. Although  
454 the ECHO Clinic will include discussion of specific cases, no identifiable personal health information will be  
455 shared, individual patients will not be identified, and no direct patient care will be provided (PCP participants will  
456 maintain responsibility for care of their patients, but will develop new clinical skills through guided practice and  
457 collaborative learning). ECHO Autism didactic presentations will include use of AIR-P toolkits, guidelines, and  
458 algorithms to enhance medical care of children with ASD, with particular emphasis on identification/screening and  
459 management of co-morbid conditions. This combination of case-based learning, co-management with autism  
460 specialists, and didactic presentations provides multiple learning modalities for enhancing PCP knowledge and  
461 expertise.  
462

463 Each team will adhere to the intervention procedures described in the Manual of Procedures. The ECHO Autism  
464 Leadership team at the University of Missouri (MU) and the Replication Support Team at the University of New  
465 Mexico will train and mentor each ECHO Autism Hub in delivery and implementation of the intervention.  
466

### *Adherence Assessment*

467  
468 Adherence/fidelity to the ECHO model will be assessed using a 25-item observer-rated form assessing fidelity of  
469 implementation including: training flow, facilitator engagement of participants, and other indicators of adherence.  
470 The measure was developed by the UNM ECHO Team to ensure that facilitators adhere to the model. Fidelity will  
471 be assessed by project leadership observing 3 randomly selected Clinics for each ECHO Autism Hub.  
472

## STUDY SCHEDULE

### *Screening*

473  
474 All providers who express interest in participation in ECHO Autism following initial recruitment efforts will be  
475 screened to ensure eligibility for the study. All providers who are screened will be tracked in a screening log  
476 maintained by each HUB. Screening will be conducted by phone, email, and a web-search of the state's medical  
477 accreditation agency to ensure that the provider meets the following criteria:  
478

- 479 • Current practice as a primary care provider (PCP).
- 480 • Currently providing care for children.

- 481 • Professional training in: general pediatrics, family medicine, advanced practice nursing (i.e. nurse practitioner  
 482 or physician assistant).  
 483 • Active medical license in state of practice.  
 484 • Patient population is at least 50% underserved.  
 485

### Screen Failures

486 Providers who are not eligible to participate in the study, but who express interest in participating in ECHO  
 487 Autism will be invited to join the Missouri ECHO Autism Clinic (an open-enrollment ECHO Clinic that does not  
 488 currently include a research component).  
 489

### Assessments

490  
 491 Each PCP participant will complete the battery of provider-completed measures (Section 7.2.1) at four time points:  
 492 Baseline/Pre-Intervention (T1), Mid-Intervention (T2), Post-Intervention (T3), and Follow-up (T4). The duration  
 493 of the ECHO intervention will be 6 months. The target time point for the T2 assessment is between the 6<sup>th</sup> and 7<sup>th</sup>  
 494 ECHO sessions. The T3 assessment will occur within 4 weeks of completion of the final ECHO session. A final  
 495 assessment will be conducted between 9 and 10 months after the start of the ECHO program.  
 496

497 In addition, chart reviews (Section 7.2.2) will be done in the same time frame for T1, T3, and T4. Because it  
 498 would not be feasible to do the chart review in the two weeks for 15 participants, the T2 review will include charts  
 499 from the 30 or 60 days before the 7<sup>th</sup> ECHO session for all participants.  
 500

501 Measures are listed below and described in section 8.  
 502

### Provider-Completed Measures

- 503  
 504 1) **ASD Knowledge** assessed by a 33-item test of knowledge of ASD screening/identification,  
 505 psychiatric co-morbidities, medical co-morbidities, and management of additional ASD-specific  
 506 needs.  
 507  
 508 2) **Self-Efficacy** assessed by a 57-item questionnaire of self-efficacy in ASD screening, identification,  
 509 and management of medical and psychiatric comorbidities.  
 510  
 511 3) **Demographic and Practice Information** assessed by self-report questionnaire at T1  
 512  
 513 4) **Satisfaction** will be assessed using a 12-item self-report survey at T3.  
 514  
 515 5) **Perceived Barriers** to caring for children with autism in primary care will be assessed at T1, T2, T3,  
 516 and T4 by participant response to an 11-item checklist.  
 517

### Chart Review Measures

- 518  
 519 1) **Clinical Practice/Behavior** will be assessed by review of a subset of charts from each PCP's  
 520 practice. Study staff will complete chart reviews either in-person at each practice location or by  
 521 remote review using an electronic medical record. Five subsets of charts will be reviewed with no  
 522 more than 25 charts from each subset being reviewed. The charts that will be reviewed are detailed in  
 523 section 8.  
 524

### Process Measures

- 525  
 526 1) **Participation** in each ECHO session for a PCP will be abstracted from the CME sign in sheets.  
 527  
 528 2) **Precise schedule** of ECHO topics and dates of PCP chart reviews will be collected and considered as  
 529 potential explanatory values for modeling outcomes, especially for the T2 assessment and chart  
 530 review which occurs during the ECHO intervention.

531

*Protocol Deviations*

532

533 Any deviations from the protocol must be recorded in the research record and reported to the ECHO Autism

534 Leadership team, the DCC, and the appropriate IRB.

**CLINICAL ASSESSMENTS AND OUTCOME MEASURES**

535

*Primary Outcome Measures*

536

537 1) **ASD Knowledge** will be assessed at T1, T2, T3, and T4 using a 33-item test developed specifically for the  
 538 current study. The original test was developed and piloted with a group of 14 PCP participants, questions with  
 539 very low difficulty were removed and/or reworded (e.g., if  $\geq 90\%$  of participants answered correctly at pre-test),  
 540 additional questions were included to ensure that all content was adequately covered. The revised version was  
 541 then piloted in a second sample of nine PCPs. The test assesses knowledge in the areas of ASD  
 542 screening/identification, psychiatric co-morbidities, medical co-morbidities, and management of additional  
 543 ASD-specific needs.

544

545 2) **Clinical Practice/Behavior** will be assessed at T1, T2, T3, and T4 by review of a subset of charts from each  
 546 PCP's practice. Five subsets of charts will be reviewed, with a limit of 25 charts in any group. If more than 25  
 547 well-child visits at a specific age are available for chart review, the most recent 25 well-child visits at a specific  
 548 age will be reviewed. The groups are:

549

550 1. Charts for **all** children seen for **9-month well-child visits** in the **30 days prior** to the date of chart review (for  
 551 assessment of ASD screening and referral practices).

552

553 2. Charts for **all** children seen for **18-month well-child visits** in the **30 days prior** to the date of chart review  
 554 (for assessment of ASD-screening and referral practices).

555

556 3. Charts for **all** children seen for **24-month well-child visits** in the **30 days prior** to the date of chart review  
 557 (for assessment of ASD-screening and referral practices).

558

559 4. Charts for **all** children seen for **30-month well-child visits** in the **30 days prior** to the date of chart review  
 560 (for assessment of ASD-screening and referral practices).

561

562 5. Charts for **all children with ASD** in the **60 days prior** to the date of chart review (for assessment  
 563 comorbidity management).

564

565 3) **Self-Efficacy** will be assessed at T1, T2, T3, and T4 using a questionnaire developed for a previous ECHO  
 566 Autism pilot study. The questionnaire is comprised of 57 items across five domains: 1) ASD screening and  
 567 identification (7 items), 2) ASD referral and resources (9 items), 3) assessment and treatment of medical  
 568 comorbidities (19 items), 4) assessment and treatment of psychiatric comorbidities (13 items), and 5) Additional  
 569 (9 items). Participants report the degree to which they are confident in their ability to provide effective care in  
 570 each domain. Items are rated on a 6-point Likert-type scale (ranging from 1= "no confidence" to 6 = "highly  
 571 confident/expert").

572

*Secondary Measures*

573

574 1) **Demographic and Practice Information** will be collected at T1 using a demographic questionnaire. Providers  
 575 will report the following information: age, gender, race, ethnicity, zip code of practice, patient population  
 576 (volume, patient characteristics), years of practice, provider type, and previous training in ASD.

577

578 2) **Satisfaction** will be assessed at T3 using a 12-item survey developed for a previous ECHO Autism pilot study.  
 579 The survey includes 10 questions assessing overall satisfaction with participation in the ECHO Autism clinic  
 580 (rated on a 5-point Likert-type scale), and two questions asking for overall comments and suggestions.

- 581  
 582 3) **Perceived Barriers** to caring for children with autism in primary care will be assessed at T1, T2, T3, and T4 by  
 583 participant response to an 11-item checklist  
 584  
 585 4) **Participation** in each ECHO session for a PCP will be abstracted from the CME sign in sheets.  
 586  
 587 5) **Precise schedule** of ECHO topics and dates of PCP chart reviews will be collected and considered as potential  
 588 explanatory values for modeling outcomes, especially for the T2 assessment which occurs during the ECHO  
 589 intervention.  
 590

#### *Intervention Fidelity Evaluations*

- 591  
 592 1) **ECHO Fidelity** will be assessed using a 25-item observer-rated form assessing fidelity of implementation  
 593 including: training flow, facilitator engagement of participants, and other indicators of adherence. The measure  
 594 was developed by the UNM ECHO Team to ensure that facilitators adhere to the model. Fidelity will be  
 595 assessed at 3 randomly selected Clinics for each ECHO Autism Hub.  
 596

### **STATISTICAL ANALYSIS PLAN**

597

#### *Statistical Considerations*

598

#### **Data Analysis**

599

600 There are two co-primary endpoints (the percent of children being screened for autism, with the chart reviews for  
 601 children of all ages combined; and the percent of co-morbidity management of autistic children in the practice).  
 602 To preserve the overall study Type I error at 0.05, we will use an alpha-level of 0.025 for each of the two  
 603 endpoints separately.  
 604

605

606 Standard summary statistics (e.g. median/IQR) will be calculated separately for each center (ECHO HUB) and  
 607 PCP within center separately for each time point. The results will be presented separately for each center over  
 608 time using a spaghetti plot. Graphs will also be prepared to present the results of each PCP within a center.

609

610 The primary outcome analysis will use a generalized mixed model analysis, using a binary distribution and logit  
 611 link for each outcome (patient screened / not screened or patient received / did not receive appropriate co-  
 612 morbidity management). Treatment effect and trend over calendar time will be fixed effects in the model. The  
 613 model will include center, PCP within center, and nominal study period of the observation as random effects. The  
 614 primary analysis will use data from T1 (baseline) and T3 (post-intervention). The determination of the utility of  
 615 the ECHO intervention will be based on these results.

616

617 An additional analysis of both primary endpoints will use data from T1, T2, and T3. The model described above  
 618 will be expanded to incorporate the precise timing of the T2 assessment for the PCP and allow for the estimated  
 619 impact of the ECHO training through that time point on each of the measures separately. For example, the change  
 620 in co-morbidity management at the T2 assessment would likely depend on the number of sessions devoted to the  
 621 topic prior to the T2 assessment for the specific PCP.

622

623 For the screening endpoint, a secondary analysis will include a factor for age group and age group x treatment  
 624 interaction to determine whether screening changes were related to the age group.

625

626 One complication with our approach is that if a PCP practice has no autism patients at the start of the study, then  
 627 the change in practice for autism patients over time will be uninformative. We anticipate that this will occur in  
 628 very few practices, but we will perform an additional analysis of the number of autism patients in each practice  
 629 using a similar approach but using a Poisson distribution and log link in the analysis.

630 A similar analysis approach to the primary analysis will be used for the other endpoints collected over time (e.g.  
631 ASD knowledge and self-efficacy measures), with appropriate adjustment of the model for the distribution of the  
632 outcome variable. The primary analysis for these endpoints will use results from T1, T2, and T3 only, and use the  
633 time on intervention as the estimate of the predicted treatment effect for period T2.

634  
635 An additional analysis of the primary endpoints, ASD knowledge, and self-efficacy will use data from T3 and T4  
636 only. The purpose of this analysis is to determine if there is a practice / skills / self-efficacy decline after the  
637 ECHO program ends.

638  
639 For data available at only a single time-point (e.g. satisfaction), results will be summarized separately for each  
640 center and compared across centers using a Kruskal-Wallis test.

641  
642 Exploratory analyses will consider the effect of PCP demographic and practice information on the treatment effect  
643 on the primary endpoints.

644

### **Power Considerations**

645  
646 Given the complexity of the proposed analysis, power calculations were based on simulations. The data  
647 generation process allowed for random effects for center, PCP within center, and nominal period. There was no  
648 time trend in the data, although a potential time trend as a fixed effect was included in the model. Simulations  
649 were done for 10 randomly selected seeds (from several different websites and different random number tables),  
650 1000 simulations per seed. The data generating process allowed for approximately a 50% intra-class correlation  
651 for the PCP within group effect, reflecting the possibility that the impact of ECHO would be correlated within  
652 each center, even with good fidelity to the intervention program. Simulations allowed for varying numbers of  
653 patients per PCP practice.

654  
655 If there are on average 5 patients per PCP (e.g. 5 autistic patients seen in the last 60 days), we would have over  
656 90% power to detect an increase of 15% in appropriate co-morbidity management ( $\alpha=0.025$ , two-sided). If  
657 there are 15 patients per PCP on average (e.g. 15 patients with well child visits in the past month), we would have  
658 over 90% power to detect an increase of 10% in autism screening ( $\alpha=0.025$ , two-sided). If the number of  
659 patients per PCP was higher, then we would have over 90% power for even smaller differences. Results were  
660 consistent for the different seeds.

## **DATA COLLECTION, MANAGEMENT, AND MONITORING**

### *Role of Data Management*

661

#### **Web-Based Data Collection and Management System**

662

663 Data collection will occur via a web-based data entry system to allow easy access to enrollment 24 hours a day,  
664 seven days a week. Participants will complete assessments using an online portal.

665

#### **Certification in the Use of Web-Based Data Entry System**

666

667 The DCC will provide training and certification of study staff in the use of the data entry system. Once certified,  
668 users are permitted to enter data into the production system. Access is password controlled. Certification for use  
669 of the web-based data entry system will be completed via individual practicum assessment.

670

671 Participants will be trained by study coordinators in the use of the EDC portal.

672

#### **Data Entry and Checks**

673

674 Data for individual participants will be recorded on electronic case report forms (eCRF) in an electronic data  
675 capture system. All participants screened for the study, including the screen failures, must be entered into the  
676 system. The EDC will reflect participant status (screen failure, enrolled, early termination, completed) at each



677 phase during the course of the study. Participants will not be identified on the eCRFs by name or initials. Each  
678 participant will be assigned a study identification number.

679  
680 Clinical data processing and management will be employed based on the procedures developed in conjunction  
681 with the AIR-P DCC. All of the data entered into the electronic data capture system will be checked for valid  
682 values and ranges, between-item logical consistency, and within-subject variation.

683

#### **Quality Assurance**

684

685 Prior to the initiation of the study, an investigator's meeting will be held with the AIR-P CCC, AIR-P DCC, the  
686 investigators and their study coordinators. This meeting will include a detailed discussion of the protocol,  
687 performance of study procedures, safety reporting requirements, electronic data capture system training and eCRF  
688 completion and simulation of study procedures, as applicable. Study staff that is responsible for the collection and  
689 submission of the study data will be required to pass eCRF training for certification prior to use of the production  
690 system for submission of the data. The study Manual of Procedures will be reviewed during training for site  
691 personnel and should be utilized to reference key details regarding study processes.

692

693 After completion of the entry process, computer logic checks or Integrity reports will be executed to assess data  
694 inconsistencies (e.g., inconsistent study dates). A response to these reports is required from site personnel by the  
695 defined report date. In addition, data modifications to the data field(s) must be made in the electronic data capture  
696 system which tracks the audit history of all data entered and modified.

697

#### ***Data Handling and Record Keeping***

698

#### **Confidentiality**

699

700 Raw data will be stored in locked cabinets in a locked office at each site. All evaluation forms, reports and other  
701 records that leave a site will be identified only by the Study Identification Number (SID) to maintain participant  
702 confidentiality. De-identified data will be submitted to a central, password-protected database provided by the  
703 DCC. The key connecting participants to their SID will be secured in a locked cabinet at each site. All computer  
704 entry and networking programs will be done using SIDs only. Data forms will only be identified by SID. A  
705 limited personal identifier (email address) will be collected in the EDC in order for the EDC to send out automated  
706 reminders for participants to complete the online portal assessments. For participants not wishing to provide this,  
707 the site will be responsible for contacting participants about completing the online portal assessments. The  
708 database will not contain any other personal identifiers other than study identification number.

709

710 ECHO clinics utilize secure video conferencing technology that meets VTC industry standards H.264, H.265,  
711 H.239, H.323 and SIP. Although the ECHO Clinic will include discussion of specific cases, no identifiable  
712 personal health information will be shared.

713 Chart reviews will be conducted on-site by study staff. For research purposes, the results from the record reviews  
714 (for chart reviews groups 1 to 4: the number of individuals screened / well-child visits by age group; for chart  
715 reviews group 5: the number of individuals receiving co-morbidity management / number of ASD visits in past 60  
716 days will be summarized from these source data. PHI will be removed and records will be identified with a unique  
717 identifier generated by Project ECHO. Study staff will be trained on the importance of confidentiality and HIPAA  
718 requirements.

719

#### **Retention of records**

720

721 Sites will comply with their individual IRB's policies for retention of records.

722

723

#### **Publications**

724

725 Publication of the results of this trial will be governed by the policies and procedures developed by the Executive  
726 Committee. Any presentation, abstract, or manuscript will be made available for review by AIR-P and HRSA prior  
727 to submission.

## References

- 728 1. American Psychiatric Association. *Diagnostic and Statistical Manual of Mental Disorders, Fifth Edition*  
729 (DSM-5). Washington, DC: American Psychiatric Association; 2013.
- 730 2. Myers SM, Johnson CP. Management of children with autism spectrum disorders. *Pediatrics*.  
731 2007;120(5):1162-1182.
- 732 3. Simonoff EM, Pickles AP, Charman TP, Chandler SP, Loucas TOMP, Baird GF. Psychiatric disorders in  
733 children with autism spectrum disorders: Prevalence, comorbidity, and associated factors in a population-  
734 derived sample. *Journal of the American Academy of Child & Adolescent Psychiatry*. 2008;47(8):921-  
735 929.
- 736 4. Estes A, Munson J, Dawson G, Koehler E, Zhou XH, Abbott R. Parenting stress and psychological  
737 functioning among mothers of preschool children with autism and developmental delay. *Autism*.  
738 2009;13(4):375-387.
- 739 5. Zablotzky B, Kalb LG, Freedman B, Vasa RA, Stuart EA. Health care experiences and perceived  
740 financial impact among families of children with an autism spectrum disorder. *Psychiatric Services*.  
741 2014;65(3):395-398.
- 742 6. Kogan MD, Strickland BB, Blumberg SJ, Singh GK, Perrin JM, van Dyck PC. A national profile of the  
743 health care experiences and family impact of autism spectrum disorder among children in the United  
744 States, 2005-2006. *Pediatrics*. 2008;122(6):e1149-1158.
- 745 7. Liptak GS, Stuart T, Auinger P. Health care utilization and expenditures for children with autism: Data  
746 from U.S. national samples. *J Autism Dev Disord*. 2006;36(7):871-879.
- 747 8. Gurney JG, McPheeters ML, Davis MM. Parental report of health conditions and health care use among  
748 children with and without autism: National Survey of Children's Health. *Archives of Pediatric Adolescent*  
749 *Medicine*. 2006;160(8):825-830.
- 750 9. US Department of Agriculture Economic Research Service. Rural america at a glance.  
751 <http://www.ers.usda.gov/Publications/EIB85/EIB85.pdf>. Updated 2011.
- 752 10. National Center for Health Statistics. *Health, united states, 2010: With special feature on death and*  
753 *dying*. Hyattsville, MD: National Center for Health Statistics; 2011.
- 754 11. DeVoe JE, Krois L, Stenger R. Do children in rural areas still have different access to health care? results  
755 from a statewide survey of oregon's food stamp population. *J Rural Health*. 2009;25(1):1-7.
- 756 12. Centers for Disease Control and Prevention. Prevalence of autism spectrum disorder among children aged  
757 8 years — autism and developmental disabilities monitoring network, 11 sites, united states, 2010.  
758 [http://www.cdc.gov/mmwr/preview/mmwrhtml/ss6302a1.htm?s\\_cid=ss6302a1\\_w](http://www.cdc.gov/mmwr/preview/mmwrhtml/ss6302a1.htm?s_cid=ss6302a1_w). Accessed 4/14/2015,  
759 2015
- 760 13. Mazurek MO, Handen BL, Wodka EL, Nowinski L, Butter E, Engelhardt CR. Age at first autism  
761 spectrum disorder diagnosis: The role of birth cohort, demographic factors, and clinical features. *J Dev*  
762 *Behav Pediatr*. 2014;35(9):561-569.
- 763 14. Carbone PS. Moving from research to practice in the primary care of children with autism spectrum  
764 disorders. *Acad Pediatr*. 2013;13(5):390-399.
- 765 15. Golnik A, Maccabee-Ryaboy N, Scal P, Wey A, Gaillard P. Shared decision making: Improving care for  
766 children with autism. *Intellectual & Developmental Disabilities*. 2012;50(4):322-331.
- 767 16. Wang LW, Tancredi DJ, Thomas DW. The prevalence of gastrointestinal problems in children across the  
768 united states with autism spectrum disorders from families with multiple affected members. *J Dev Behav*  
769 *Pediatr*. 2011;32(5):351-360.
- 770 17. Richdale AL. Sleep problems in autism: Prevalence, cause, and intervention. *Dev Med Child Neurol*.  
771 1999;41(1):60-66.
- 772 18. Liptak GS, Stuart T, Auinger P. Health care utilization and expenditures for children with autism: Data  
773 from U.S. national samples. *J Autism Dev Disord*. 2006;36(7):871-879.
- 774 19. Mandell DS, Cao J, Ittenbach R, Pinto-Martin J. Medicaid expenditures for children with autistic  
775 spectrum disorders: 1994 to 1999. *J Autism Dev Disord*. 2006;36(4):475-485.
- 776 20. Lokhandwala T, Khanna R, West-Strum D. Hospitalization burden among individuals with autism. *J*  
777 *Autism Dev Disord*. 2012;42(1):95-104.
- 778 21. Gurney JG, McPheeters ML, Davis MM. Parental report of health conditions and health care use among  
779 children with and without autism: National survey of children's health. *Arch Pediatr Adolesc Med*.  
780 2006;160(8):825-830.

- 781 22. Arora S, Kalishman S, Thornton K, et al. Expanding access to hepatitis C virus treatment--extension for  
782 community healthcare outcomes (ECHO) project: Disruptive innovation in specialty care. *Hepatology*.  
783 2010;52(3):1124-1133.
- 784 23. Bandura A. *Social foundations of thought and action*. Englewood Cliffs, NJ: ; 1986.
- 785 24. Bandura A. *Self-efficacy: The exercise of control*. New York, NY: Freeman; 1997.
- 786 25. Vygotsky L. *Mind and society: The development of higher mental processes*. Cambridge, MA: Harvard  
787 University Press; 1978.
- 788 26. Lave J, Wenger E. *Situated learning: Legitimate peripheral participation*. Cambridge University Press;  
789 1991.
- 790 27. Arora S, Thornton K, Murata G, et al. Outcomes of treatment for hepatitis C virus infection by primary  
791 care providers. *N Engl J Med*. 2011;364(23):2199-2207.
- 792 28. Scott JD, Unruh KT, Catlin MC, et al. Project ECHO: A model for complex, chronic care in the pacific  
793 northwest region of the united states. *J Telemed Telecare*. 2012;18(8):481-484
