# Supplementary material
Source: PubMed Central journal article supplement (PMC7063545)
Supplement: jamapediatr-174-e196306-s003.pdf [file jamapediatr-174-e196306-s003.pdf]

**ECHO AUTISM**  
**Statistical Analysis Plan**  
**Version 1.01**  
**Version Date: October 29, 2018**

**Signature Page**



---

Kristin Sohl, MD  
Thompson Center for Autism and other Neurodevelopmental Disorders,  
University of Missouri  
Study Chair

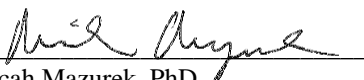

---

Micah Mazurek, PhD  
University of Virginia  
Study Co-Chair



---

Robert A. Parker, ScD  
MGH Biostatistics Center  
Harvard Medical School  
Study Statistician

**ABBREVIATIONS AND DEFINITIONS**

38

|       |                                                                          |
|-------|--------------------------------------------------------------------------|
| AIR-P | Autism Intervention Research Network on Physical Health                  |
| ASD   | Autism Spectrum Disorder                                                 |
| ATN   | Autism Treatment Network                                                 |
| DCC   | Data Coordinating Center                                                 |
| ECHO  | Extension for Community Healthcare Outcomes                              |
| HRSA  | Health Resources and Services Administration                             |
| IRB   | Institutional Review Board                                               |
| PCP   | Primary Care Provider (includes non-physicians e.g. Nurse Practitioners) |
| SAP   | Statistical Analysis Plan                                                |
| UNM   | University of New Mexico                                                 |

39

## 4 OVERVIEW

40

### 4.1 *Brief Description of Study*

41 ECHO Autism was intended to assess rigorously the impact of a 12-session telemedicine training program on  
42 participating PCP's knowledge, clinical behavior, and self-efficacy in the screening and care of children with ASD.  
43 Each session is referred to as an "ECHO clinic".

44 The study involved 10 sites (each referred to as an "ECHO Autism Hub"), each running a 12-session training  
45 program using a common curriculum and core lecture, with each site expected to recruit 15 PCPs. Sites were  
46 randomized in a stepped-wedge design with 5 clusters (2 sites per cluster) and a staggered start over a 1-year period.  
47 Staggering the start allowed for some control for potential temporal trends, as well as allowing the core team to  
48 focus on working with each site to ensure smooth startup of the training program at each site.

49 Outcomes are measured at baseline (T1), during the intervention (T2, approximately 3 months after the start of the  
50 intervention), and after the end of the intervention (T3). An additional measurement (T4) was made 3 months after  
51 the end of the intervention to assess whether deterioration occurs after clinic participation ends.

52 All PCP participants received the intervention.

53 IRB approval was obtained by each ECHO Autism Hub and the central Data Coordinating Center (DCC).

54 The study was funded by the Autism Intervention Research Network on Physical Health (AIR-P) which is supported  
55 by the Health Resources and Services Administration (HRSA).

56

### 4.2 *Scope of Analysis*

57 This is intended to be the SAP for the primary analysis for the study. Thus, this document includes:

- 58 • primary analysis for each study endpoint; and
- 59 • pre-defined sensitivity and exploratory analyses of study endpoints.

60 In the case of discrepancies between this document and the study protocol, this document has priority on all issues  
61 related to the analysis of the study.

62 Revisions to the SAP in this amendment were made to (a) clarify specific analysis issues; (b) allow for  
63 contingencies when there was concern that primary analyses were not possible (e.g. convergence issues of models);  
64 and (c) to correct previous documentation errors.

65

## 5 STUDY OBJECTIVES AND OUTCOME MEASURES

### 5.1 *Study Objectives*

66 To determine whether participation in a collaborative telehealth intervention will result in improved learning,  
67 clinical practice behavior and efficacy among primary care providers (PCPs).

68 **Hypothesis 1:** Following participation in ECHO Autism, PCPs will demonstrate significant improvements in ASD  
69 knowledge as assessed by pre- to post-intervention knowledge tests in ASD screening and identification and  
70 assessment and treatment of medical co-morbidities.

71 **Hypothesis 2:** Following participation in ECHO Autism, PCPs will demonstrate significant improvements in  
72 clinical practice/behavior as assessed by pre- to post-intervention chart reviews in ASD screening (co-primary  
73 outcome) and treatment of medical co-morbidities, in particular, sleep problems and constipation (co-primary  
74 outcome).

75 **Hypothesis 3:** Following participation in ECHO Autism, PCPs will demonstrate significant improvements in self-  
76 efficacy in ASD screening and identification and treatment of medical co-morbidities.

77

### 5.2 *Outcome Measures*

78 The primary outcome measures for the study, as specified in Hypothesis 2 are:

- 79 • clinical practice / behavior based on
  - 80 ○ screening of children at well child visits, described in Section 6.3.1.1; and
  - 81 ○ treatment of co-occurring medical conditions at visits of children with ASD, described in Section  
82 6.3.1.2

83 The specified secondary endpoints are:

- 84 • an ASD Knowledge quiz (Hypothesis 1), described in Section 6.3.2.1; and
- 85 • a self-efficacy assessment (Hypothesis 3), described in Section 6.3.2.2.

86 Although not formally stated in a hypothesis, an outcome measure related to treatment of co-occurring medical  
87 conditions in children with ASD is:

- 88 • number of co-morbidities reported in children with ASD, described in Section 6.3.3.

89 Although not formally stated in a hypothesis, an outcome measure related to self-efficacy is:

- 90 • perceived barriers to care for children with ASD, described in Section 6.3.4.

91

## 6 STUDY METHODS

### 6.1 *Inclusion-Exclusion Criteria and General Study Population*

#### 6.1.1 Participant Inclusion Criteria

92 All the following inclusion criteria must be met for a participant for the study:

- 93 • Current practice as a primary care provider (PCP).
- 94 • Currently providing care for children.
- 95 • Professional training in: general pediatrics, family medicine, advance practice nursing (i.e. nurse
- 96 practitioner or physician assistant).
- 97 • Active medical license in the state of practice.
- 98 • Patient population is at least 50% underserved.

99

#### 6.1.2 Participant Exclusion Criteria

100 Any of the following would preclude an individual from participating in the study:

- 101 • Trainee status (e.g., medical student, intern, resident, or other pre-professional trainee).
- 102 • Subspecialist (e.g., psychiatrists, neurologists, developmental and behavioral pediatricians).
- 103 • Practicing within the same practice as another PCP Participant (i.e., only one PCP participant from any
- 104 given practice may be enrolled as a research participant in the study).

105

### 6.2 *Schedule of Assessments*

106 After informed consent, PCP participants provided demographic and practice information (Section 6.4.1) before the

107 start of the study.

108 Each PCP participant was supposed to complete the battery of provider-completed measures at four timepoints:

109 Baseline/Pre-Intervention (T1), Mid-Intervention (T2), Post-Intervention (T3), and Follow-up (T4). The duration of

110 the ECHO intervention will be 6 months. The target time point for the T2 assessment is between the 6th and 7th

111 ECHO sessions. The T3 assessment should occur within 4 weeks of completion of the final ECHO session. The

112 Follow-up assessment (T4) should be conducted between 9 and 10 months after the start of the ECHO program.

113 Provider completed measures at these time points are: (a) ASD Knowledge Quiz (Section 6.3.2.1); (b) ASD Self-

114 Efficacy (Section 6.3.2.2); and (c) Perceived Barriers to Care for Children with Autism in Primary Care (Section

115 6.3.4).

116 Chart reviews were planned to be done in the same time frame for T1, T3, and T4. Because it would not be feasible

117 to do the chart review in the two weeks for 15 participants, the T2 review will include charts from the 30 or 60 days

118 before the 7th ECHO session for all participants, or earlier if the clinic is visited before the 7<sup>th</sup> ECHO session.

119 PCP participants answer a satisfaction questionnaire (Section 6.4.3) at the end of the training program.

120

### 6.3 *Study Assessments: Outcome Measures*

121

#### 6.3.1 Primary Endpoints: Clinical Practice / Behavior

122

##### 6.3.1.1 Screening Practice (co-primary endpoint)

123 Clinical Practice/Behavior was assessed at T1, T2, T3, and T4 by review of a subset of charts from each PCP's

124 practice. Four subsets of charts will be reviewed, with a limit of 25 charts in any group. The groups are:

- 125 1. Charts for all children seen for 9-month well-child visits in the 30 days prior to the date of chart review.
- 126 2. Charts for all children seen for 18-month well-child visits in the 30 days prior to the date of chart review.
- 127 3. Charts for all children seen for 24-month well-child visits in the 30 days prior to the date of chart review.
- 128 4. Charts for all children seen for 30-month well-child visits in the 30 days prior to the date of chart review.

129 If more than 25 well-child visits at a specific age are available for chart review, the most recent 25 well-child visits

130 at a specific age will be reviewed.

131 Because of the timing and feasibility of doing all chart-reviews in the 2-week interval between the 6<sup>th</sup> and 7<sup>th</sup> ECHO

132 clinics, the 30-days was either (a) the 30-days prior to the date of the 7<sup>th</sup> ECHO clinic; or (b) the 30-days prior to the

133 date of the visit scheduled for chart reviews, if the visit occurred prior to the 7<sup>th</sup> clinic.

134 These chart reviews assess the adequacy of screening for each child at each visit. The screening practice is  
 135 summarized over the four sets of charts as total number screened appropriately / total number of charts reviewed and  
 136 then converted to a percentage.

137 For the 9 US sites, adequate screening, as defined by US guidelines consider the use of any general developmental  
 138 screening tool as appropriate screening for the 9- and 30-month visits. For the 18- and 24-month visits, an ASD  
 139 specific screen must have been used for the child to be considered correctly screened for Autism.

140 A different guideline is used in Canada, so that adequate screening was defined differently for the Canadian site.  
 141 The recommended screening practice in Canada uses a general developmental screening tool at 12- and 18-month  
 142 well-child visits. Only visits at those times were reviewed at the Canadian site, and children were considered  
 143 appropriately screened if a general developmental screening tool was administered.

144 For analysis purposes, the results of each individual chart reviewed (screened or not screened appropriately) is used  
 145 in the analysis rather than the summary over all charts for a PCP.

146 PCPs having no well-child visits at baseline would have baseline results imputed if appropriate (Section 8.4.1).

147

### 6.3.1.2 Treatment of Co-morbidities in Children with ASD (co-primary endpoint)

148 Clinical Practice/Behavior was assessed at T1, T2, T3, and T4 by review of charts for all children with ASD in the  
 149 60 days prior to the data of the chart review.

150 The score is based on treating reported conditions appropriately. Any of a range of treatments was considered  
 151 appropriate for each condition. Charts without any reported conditions are excluded in this analysis. The total  
 152 number of appropriately treated conditions among the total number of conditions reported is converted to a  
 153 percentage. PCPs having no ASD visits at baseline would have baseline results imputed if appropriate (Section  
 154 8.4.1).

155

## 6.3.2 Prespecified Secondary Endpoints

### 6.3.2.1 ASD Knowledge

156 ASD knowledge was assessed at T1, T2, T3, and T4 using a 33-item test developed specifically for the current  
 157 study. The original test was developed and piloted with a group of 14 PCP participants, questions with very low  
 158 difficulty were removed and/or reworded (e.g., if at least 90% of participants answered correctly at pre-test), and  
 159 additional questions were included to ensure that all content was adequately covered. The revised version was then  
 160 piloted in a second sample of nine PCPs. The test assesses knowledge in the areas of ASD screening/identification,  
 161 psychiatric co-morbidities, medical co-morbidities, and management of additional ASD-specific needs.

162 This test is scored (maximum of 1 point per question) and the score is then converted to a percent, with 100%  
 163 representing no errors. Scoring is based on the total number of correct answers, among all 33 questions. Any  
 164 missing answers are counted as incorrect responses.

165 There are several specific considerations for the scoring:

- 166 • Questions 24, 25, 28, and 32 ask to check all answers that apply: these are scored as zero if any incorrect  
 167 option is selected, and if no incorrect options are selected then each correct selection is given an  
 168 appropriate fraction of a point, e.g. for question 28 there are three answers (out of the four options) which  
 169 should be selected, if the incorrect option is not selected each correct option is given 1/3 of a point;
- 170 • An ambiguity was identified in question 7 after the study started, and either possible answer (annually, as  
 171 the child has already been on the medication for three years; or baseline, 6 months, annually, which was the  
 172 intended answer for the schedule of testing from initial use) is scored as correct; and
- 173 • Because of differences in Canadian and US screening practices, questions 22, 23, and 25 are not scored for  
 174 the Canadian site, and the percent is based on the total score divided by 30.

175 The baseline data suggested that the overall score ranged between 20-80% indicating that this can be analyzed as a  
 176 continuous variable.

177

### 6.3.2.2 ASD Self-Efficacy

178 ASD self-efficacy was assessed at T1, T2, T3, and T4 using a questionnaire developed for a previous ECHO Autism  
 179 pilot study. The questionnaire is comprised of 57 items across five domains: 1) ASD screening and identification (7  
 180 items), 2) ASD referral and resources (9 items), 3) assessment and treatment of medical comorbidities (19 items), 4)  
 181 assessment and treatment of psychiatric comorbidities (13 items), and 5) additional (9 items). Participants report the  
 182 degree to which they are confident in their ability to provide effective care in each domain. Items are rated on a 6-  
 183 point Likert-type scale (ranging from 1= "no confidence" to 6 = "highly confident/expert").

184 Items are recoded to a 0 ("no confidence") to 5 ("highly confident/expert") and then summed for a total score and the  
 185 five sub-scale scores. These scores are then normalized to a percentage, by dividing by 5 x number of relevant items  
 186 (57 for the total scale, 7, 9, 19, 13, and 9 for the subscale if no missing data).

187 A subscale score is set to missing if more than 20% of the questions in that subscale are not answered. The total  
 188 score is set to missing if 6 or more questions are missing or if any subscale score is missing. Only the total score of  
 189 the ASD self-efficacy scale will be examined in this analysis.

190 The structure of the self-efficacy questionnaire means that the total score is the number of points achieved out of a  
 191 total of 285 possible points. This number is high enough that it would be safe to consider this a normally distributed  
 192 variable.

193

### 6.3.3 Additional Outcome Measure Related to Treatment of Comorbidities: Number of Reported Co-morbidities in Children with ASD

194 Related to the number of co-morbidities correctly treated, but not stated in a formal hypothesis, is the number of  
 195 reported co-morbidities needing treatment in children with ASD. The summary measure is defined as the number of  
 196 comorbidities reported among the 4 possible comorbidities for a child.

197 For analysis purposes, the number of co-morbidities reported for each chart reviewed will be used.

198 PCPs having no ASD visits at baseline have baseline results imputed if appropriate (Section 8.4.1).

199

### 6.3.4 Additional Outcome Measure Related to Self-Efficacy: Perceived Barriers to Care for Children with Autism in Primary Care

200 This was assessed at T1, T2, T3, and T4 by participant response to a 9-item checklist with two additional open-  
 201 ended questions. Descriptive analysis will give the proportion of participants with each specific barrier at each time  
 202 point and summarize the additional questions.

203 For analysis purposes, the total number of specific barriers checked will be calculated for each PCP. The first of the  
 204 open-ended questions ("Other/specify") will be included as a 10<sup>th</sup> barrier in the count of number of barriers checked.

205

## 6.4 Additional Measures

### 6.4.1 Demographic and Practice Information

206 This Information was collected at baseline using a demographic questionnaire. Providers report the following  
 207 information: age, gender, race, ethnicity, zip code of practice, patient population (volume, patient characteristics),  
 208 years of practice, provider type, and previous training in ASD.

209

### 6.4.2 Amount of Training

210 This was abstracted from the CME sign-in sheets for all participants. The amount of training will be analyzed as the  
 211 percentage attendance for available sign-in sheets.

212

### 6.4.3 Satisfaction

213 This was assessed at completion of the intervention (T3) using a 12-item survey developed for a previous ECHO  
 214 Autism pilot study. The survey includes 10 questions assessing overall satisfaction with participation in the ECHO  
 215 Autism clinic (rated on a 5-point Likert-type scale, 1="Strongly agree" to 5="Strongly disagree"), and two questions  
 216 asking for overall comments and suggestions.

217 Overall benefit of the program is defined as the proportion of participants who answer question 1 ("Participation in  
 218 ECHO Autism improved my ability to care for children with autism in my practice") with a response of "Strongly  
 219 Agree" or "Agree".

220

#### 6.4.4 Intervention Fidelity Evaluations

221 The fidelity of the ECHO intervention was assessed using a 25-item observer-rated form assessing fidelity of  
222 implementation including: training flow, facilitator engagement of participants, and other indicators of adherence.  
223 Each item is measured on a 5-point Likert scale from 1="Strongly disagree" to 5 = "Strongly agree". The measure  
224 was developed by the UNM ECHO Team to ensure that facilitators adhere to the model. Fidelity will be assessed at  
225 2 randomly selected Clinics for each ECHO Autism Hub.

226 Fidelity of an ECHO clinic will be determined as the percent of questions answered as "agree" or "strongly agree"  
227 among all the questions completed. Questions which were not completed are ignored in this calculation as the  
228 auditor considered some items not applicable on a specific call. Adequate fidelity is defined to be 80% or higher  
229 fidelity.

230

#### 6.5 Data Monitoring through Study

##### 6.5.1 Routine Monitoring and Quality Control

231 The study data was subject to routine checks on a monthly basis. Each month, query reports were run on the data  
232 and individual query reports were sent to sites. Query reports noted incomplete or missing forms, illogical or  
233 inconsistent data, range checks for values and dates, and other issues as needed. Sites were required to address all  
234 queries on the report and return them to the DCC data manager in a timely manner and resolve issues with the DCC  
235 data manager as necessary. Additionally, monthly completion reports were generated through the course of the  
236 study, which noted the number of forms that were complete, incomplete, and missing at each site. This was used to  
237 monitor data collection progress during the study. A report tracking enrollment was also generated on a monthly  
238 basis. Data monitoring activities were unblinded, but there was no systematic summary of results and data was used  
239 only to monitor for quality issues and track data collection.

240

##### 6.5.2 DSMB Monitoring

241 The study was monitored by the standing AIR-P network DSMB annually. The DSMB recommended continuation  
242 of the study without modification at each annual review.



## 7 SAMPLE SIZE

243 When the study was planned, the sample size was determined based on feasibility / practicality considerations, given  
244 the number of sites (10) and what was considered a feasible enrollment target (15 PCPs per site) for the program  
245 with an expectation of minimal dropout. Based on these assumptions, results of simulations suggested that the study  
246 would have a reasonable chance of detecting clinically important changes and was described in the protocol as  
247 follows:

248         Given the complexity of the proposed analysis, power calculations were based on simulations. The data  
249 generation process allowed for random effects for center, PCP within center, and nominal period. There  
250 was no time trend in the data, although a potential time trend as a fixed effect was included in the model.  
251 Simulations were done for 10 randomly selected seeds (from several different websites and different  
252 random number tables), 1000 simulations per seed. The data generating process allowed for approximately  
253 a 50% intra-class correlation for the PCP within group effect, reflecting the possibility that the impact of  
254 ECHO would be correlated within each center, even with good fidelity to the intervention program.  
255 Simulations allowed for varying numbers of patients per PCP practice.

256         If there are on average 5 patients per PCP (e.g. 5 autistic patients seen in the last 60 days), we would have  
257 over 90% power to detect an increase of 15% in appropriate co-morbidity management ( $\alpha=0.025$ , two-  
258 sided). If there are 15 patients per PCP on average (e.g. 15 patients with well child visits in the past  
259 month), we would have over 90% power to detect an increase of 10% in autism screening ( $\alpha=0.025$ ,  
260 two-sided). If the number of patients per PCP was higher, then we would have over 90% power for even  
261 smaller differences. Results were consistent for the different seeds.

262

## 8 GENERAL ANALYSIS CONSIDERATIONS

### 8.1 *Statistical Standards*

#### 8.1.1 **Statistical Software**

263 All analyses will be done in the latest version of SAS available at the Massachusetts General Hospital Biostatistics  
264 Center, the Data Coordinating Center for the AIR-P and graphs prepared in R.

265 The version currently available at time of SAP preparation is version 9.4 for SAS and version 3.5 for R.  
266

#### 8.1.2 **Reporting and Scoring Conventions**

267 Given the planned sample size (150 participants), percent will be reported in whole numbers (no decimal places),  
268 rounded as needed.

269 For continuous variables, results will be reported to the same precision as the raw data, generally without decimal  
270 places.

271 Scoring instructions have been given for each instrument separately above.

#### 8.1.3 **Summary Statistics**

272 Summary statistics for categorical variables will be counts and percents. The percents for valid responses will be  
273 based on non-missing responses (e.g. if the variable has responses for Yes and No, the total of the two percents will  
274 be 100 even if some data is missing). The percent for missing data will be calculated based on the total number of  
275 responses to that questionnaire.

276

#### 8.1.4 **Basic Statistical Analyses**

277

##### 8.1.4.1 **Analyses Between Groups**

278 All statistical analyses will be adjusted for site.

279 Bivariate statistical analyses (e.g. between completers and non-completers, Sections 9.4 and 9.5) will use Van  
280 Elteren's test for continuous variables and Cochran-Mantel-Haenszel statistics for categorical variables.  
281

##### 8.1.4.2 **Analyses for Differences by Site**

282 This analysis will use Kruskal-Wallis test for continuous variables and Fisher's exact test (extension) for categorical  
283 variables.

284

#### 8.1.5 **Blinded Data Review**

285 As all participants were known to be receiving the intervention, blinded data review was not possible. No summary  
286 of data collected after baseline was done except as noted in Section 12 (operational issues). No analyses of data after  
287 baseline were done until after the initial version of the SAP was finalized.

### 8.2 *Analysis Populations*

288 There will be two analysis populations for the data collected from baseline through six months:

289 a) an **efficacy analysis** will be limited to the group of PCPs who complete the six-month training program  
290 (**completers**). Completion is defined by:

291 i) having chart reviews completed at six months; and

292 ii) completing at least one of the participant surveys at six months.

293 Note that completion does not imply that the PCP attended a specific minimum number of sessions.

294 b) an **effectiveness analysis** will use the **total population** enrolled without exclusions.

295 There will be a single analysis population for analyses involving data collected at nine months:

296 c) long-term impact at 9 months will be assessed using the completers group.  
297

### 8.3 *Covariates and Subgroups*

298 Exploratory analyses will assess the impact of:

- 299 • demographic variables on outcome
- 300 • practice information on outcome
- 301 • fidelity of intervention on outcome classified as sites with all clinics meeting the fidelity standard in
- 302 Section 6.4.4 vs. sites with one or more clinics failing to meet the fidelity standard;
- 303 • amount of training on outcome

304 No formal summary by subgroups is planned.

305

### 8.4 *Missing Data Imputation*

#### 8.4.1 *Imputing Missing Data for Baseline Measures*

306 Since baseline values are included in the basic modeling analysis of the study (Section 10.3), baseline data for a  
 307 primary outcome measure (listed in Section 6.3.1) for a PCP will be imputed using multiple imputation if there is  
 308 data at three- and six-months for the outcome measure for that PCP.

309 Such missing data would occur if there are no well-child visits or no ASD child visits at baseline for a PCP.  
 310 Imputation for a primary outcome will only be done if it allows us to include at least 5% more individuals in the  
 311 analysis for a primary outcome measure. Several PCPs had very low volume offices, so that before embarking on  
 312 multiple imputation we are requiring that there be sufficient information to be gained to make the additional  
 313 complexity worthwhile.

314 Data will be imputed from the distribution of site specific values of the baseline data. Imputation will not be done  
 315 for other measures.

316

#### 8.4.2 *Imputing Data for Missing Three and Six Month Visits*

317 For the missing three- and six-month time visits we will use baseline data, if available. We recognize that this is an  
 318 extremely conservative assumption and biases the effectiveness but believe it is appropriate in this project for  
 319 several reasons.

320 1. Little improvement is likely for participants dropping out before the midpoint visit because of minimal training.  
 321 Thus, the baseline would be a reasonable estimate of practice at the missing time points.

322 2. It is less clear whether there would be deterioration (if a midpoint value is available) for a participant  
 323 discontinuing the program between the three- and six-month visits. Data review found that only about 3% of the  
 324 participants discontinued after the three-month chart review/survey and before the six-month chart review/survey.  
 325 As there are concerns about deterioration after participation ends (being assessed in the deterioration analysis), it is  
 326 more conservative to use the baseline value at six months for participants missing only this data point.

327

#### 8.4.3 *Imputing Data for Analyses of Nine Month Visits*

328 No data will be imputed for any time point in the analysis of the nine-month time point. Imputation of baseline  
 329 data at the six and nine months would reduce any observed changes.

330

### 8.5 *Interim Analyses*

331 No interim analyses were done in this study.

332

### 8.6 *Multiplicity Considerations*

333 The protocol specified that a multiplicity adjustment would be made for the primary analysis of the co-primary  
 334 endpoints. For all other analyses,  $P < 0.05$  (two-sided) will be considered statistically significant.

335

## 9 SUMMARY OF STUDY DATA

### 9.1 *Participant Disposition*

336 The study did not collect data on all potential participants contacted for the study. Only the number of participants  
337 recruited and their disposition by study interval (T2, T3, T4) will be described.

338

### 9.2 *Protocol Deviations*

339 The following protocol deviations have been reported:

| Deviation Type   | Number | Description                                                                                                                                                                                                                                                                                                                                                                                                                             |
|------------------|--------|-----------------------------------------------------------------------------------------------------------------------------------------------------------------------------------------------------------------------------------------------------------------------------------------------------------------------------------------------------------------------------------------------------------------------------------------|
| Eligibility      | 1      | One participant was found to be ineligible due to overlap in patient population with another provider. This participant was dropped from the study prior to completing any baseline forms.                                                                                                                                                                                                                                              |
| Study procedure  | 5      | Five participants were unable to complete chart reviews.                                                                                                                                                                                                                                                                                                                                                                                |
| Visit scheduling | 20     | Two providers did not complete the baseline surveys and were dropped from the study. Five providers were given access to the survey forms early for one timepoint, and completed surveys earlier than scheduled. Two deviations for one provider were reported for enrollment and completion of baseline surveys after the first ECHO clinic. Eleven providers completed provider surveys after the survey collection window had ended. |
| Missed visit     | 9      | Nine deviations across six providers were reported for incomplete or missing provider surveys.                                                                                                                                                                                                                                                                                                                                          |
| Total            | 35     |                                                                                                                                                                                                                                                                                                                                                                                                                                         |

340

341 None were considered serious enough to exclude available data from the analysis.

342

### 9.3 *Demographic and Practice Information*

343 Demographic and practice information will be summarized for the entire population. Demographic and practice  
344 information will also be summarized separately for completers and non-completers including assessing the statistical  
345 significance of differences between the two groups to assess the representativeness of the group completing the  
346 study.

347 Variables are listed in Section 6.4.1.

348

### 9.4 *Baseline Outcome Measures*

349 Baseline outcome measures will be summarized for the entire population. Baseline variables will also be  
350 summarized separately for completers and non-completers including assessing the statistical significance of  
351 differences between the two groups to assess the representativeness of the group completing the study, and  
352 separately by site to assess comparability of site.

353 Variables to be summarized are described in Section 10.1

354

### 9.5 *Participant Attendance*

355 The amount of training will be summarized (Section 6.4.2). In addition to the standard summary statistics, the  
356 cumulative proportion of those participating in X% or more of sessions (where X varies from 0 to 100) will be  
357 calculated.

358

### 9.6 *Satisfaction*

359 Summaries of the distribution of each satisfaction question will be done across all sites. In addition, a list of all the  
360 individual responses to the specific questions will be prepared.

361 These results will also be summarized separately for each site in the overall report. Sites will be referred to by letter  
362 (e.g. "A", "B", ... , "J") which will be assigned randomly and will not be based on study cohort.

363 To preserve anonymity of the site data, proportions will be grouped or rounded so that individual sites cannot be  
364 identified based on the proportions in the overall report.

365 Site specific results will be supplied to each site for quality improvement purposes.

366

#### **9.7 Intervention Fidelity**

367 Intervention fidelity will be calculated for the entire program and separately for each site using all available  
368 intervention fidelity evaluations using both the fidelity score and the proportion of clinics with adequate fidelity  
369 (both defined in Section 6.4.4).

370 These results will also be summarized separately for each site in the overall report. Sites will be referred to by letter  
371 (e.g. "A", "B", ... , "J") which will be assigned randomly and will not be based on study cohort.

372 To preserve anonymity of the site data, proportions will be grouped or rounded so that individual sites cannot be  
373 identified based on the proportions in the overall report.

374 Site specific results will be supplied to each site for quality improvement purposes.

375

## 10 ANALYSIS OF OUTCOMES

### 10.1 Outcome Measures

376 The table below lists for each outcome variable (a) the raw data used in the analysis for the outcome variable; (b) the  
 377 distribution / link to be used in the model; and (c) the baseline summary for the participant included in the model.  
 378 Alternate approaches are identified if models for the prespecified outcomes fail to estimate parameters or results  
 379 appear inconsistent with the summary data (See Section 10.6)

| Variable                                                                 | Raw Data Used in Analysis                                                                                                                                                                                                                      | Distribution and Link to be Used             | Baseline Value for Participant Used                                                           |
|--------------------------------------------------------------------------|------------------------------------------------------------------------------------------------------------------------------------------------------------------------------------------------------------------------------------------------|----------------------------------------------|-----------------------------------------------------------------------------------------------|
| <b>Co-Primary Endpoints</b>                                              |                                                                                                                                                                                                                                                |                                              |                                                                                               |
| Proportion screened (Section 6.3.1.1)                                    | Screening (Yes/No) for each chart abstracted<br>Alternate: total number screened/ number of charts reviewed                                                                                                                                    | Binary/Logit<br>Alternate: Binomial/Logit    | Proportion of all children screened at T1.<br>Range: 0-1                                      |
| Proportion of reported comorbidities correctly treated (Section 6.3.1.2) | Number of comorbidities correctly treated for all reported comorbidity for a child. Children with no reported comorbidities are not included in the analysis.<br>Alternate: total correctly treated / total number of comorbidities identified | Binomial/Logit<br>Alternate: Binomial/Logit  | Proportion of comorbidities correctly treated over all ASD children seen at T1.<br>Range: 0-1 |
| <b>Prespecified Secondary Outcome Measures</b>                           |                                                                                                                                                                                                                                                |                                              |                                                                                               |
| ASD knowledge (Section 6.3.2.1)                                          | Percent score, as described in Section 6.3.2.1                                                                                                                                                                                                 | Normal / Identity<br>Alternate: Beta / Logit | Percent score at T1.<br>Range 0-100                                                           |
| ASD self-efficacy (Section 6.3.2.2)                                      | Percent score, as described in Section 6.3.2.2                                                                                                                                                                                                 | Normal/Identity<br>Alternate: Beta/Logit     | Percent score at T1.<br>Range 0-100                                                           |
| <b>Additional Secondary Outcome Measures</b>                             |                                                                                                                                                                                                                                                |                                              |                                                                                               |
| Number of co-morbidities reported (Section 6.3.3)                        | Number of co-morbidities reported for each child with ASD out of the 4 possible comorbidities per child.<br>Alternate: total number identified / total possible                                                                                | Binomial/Logit<br>Alternate: Binomial/Logit  | Mean number of comorbidities over all ASD children seen at T1.<br>Range: 0-4.                 |
| Perceived barriers to care (Section 6.3.4)                               | Total number of specific barriers checked / total number possible, as described in Section 6.3.4<br>Alternate: total number of specific barriers                                                                                               | Binomial/Logit<br>Alternate: Poisson/Log     | Proportion at T1. Range 0-1<br>Alternate: Number at T1. Range: 0-10                           |

### 10.2 Descriptive Summary of Outcome Measures

380 The observed data (without imputation) will be summarized for each outcome measure at each time point.  
 381

382

### 10.3 *Efficacy Analyses*

#### 10.3.1 **Primary Efficacy Analyses**

383 The primary efficacy analysis will be done in the completer population.

384 After imputation of missing data as described in Section 8.4, a generalized linear mixed model analysis will be used  
385 to predict the outcome (listed in Section 10.1, with details of how each variable is calculated and baseline is  
386 calculated) with the following fixed effects:

- 387 • period (cohort), a continuous variable from 1-5;
- 388 • time point (treated both as categorical variables [coded as "baseline", "3 months" and "6 months"] and as a  
389 continuous variable [coded as 0, 0.5, 1.0]; see below);

390 and the following random effects:

- 391 • site; and
- 392 • participant.

393 After the initial analysis, a final decision will be made as to whether the effect of time point should be treated as a  
394 categorical or a continuous variable. If the results suggest that there is a substantial benefit to treating time point as  
395 a categorical variable in at least one of the two co-primary outcome measures, then it will be retained as a  
396 categorical variable for all outcome measures; otherwise it will be treated as a continuous variable. For the purposes  
397 of this analysis, a substantial benefit is defined as a statistically significant improvement using a likelihood ratio test  
398 when time is treated as a categorical variable rather than a continuous variable. The decision in the primary efficacy  
399 analysis will be used in all other analyses.

400 Technical note: This model will use PROC GLIMMIX, and two random statements, one fitting a random intercept  
401 for site (RANDOM SITE) and one fitting a random intercept for PCP (RANDOM /subject = PCP). Note that  
402 although multiple imputation (PROC MIANALYZE) should work with PROC GLIMMIX results, there are reports  
403 of computational problems arising. Should such problems arise in the analysis of the data from the study, the use of  
404 multiple imputation will be reconsidered.

405

#### 10.3.2 **Sensitivity Efficacy Analyses**

406 Because of differences in screening practices at one site, the primary efficacy analysis of screening will be repeated  
407 with the data from this site removed to ensure robustness of conclusions.

408

#### 10.3.3 **Exploratory Analyses**

409 Exploratory analyses will explore whether demographic or practice variables (Section 6.4.1), or the amount of  
410 training (Section 6.4.2) are predictors of screening practice or treatment of comorbidities. Such analyses will be  
411 done by adding the relevant demographic or practice variable to the model in Section 10.3.1, to determine the  
412 statistical significance of the factor as a main effect.

413 We will also explore whether there are differences in screening rates by well-child visit by incorporating a term for  
414 the well-child visit in the model specified in Section 10.3.1. This will exclude the data from the site with different  
415 screening practices.

416 No exploratory analyses are planned for the other endpoints.

417

### 10.4 *Effectiveness Analysis*

418 The effectiveness analysis will repeat the efficacy analysis (Section 10.3) for the total population.

419

### 10.5 *Analysis of Long-Term Impact*

420 This analysis will estimate how much of a change occurs at 9 months. It will extend the model included in the  
421 efficacy analysis (section 10.3.1) using the following predictors as fixed effects in the generalized linear mixed  
422 model framework:

- 423 • period (cohort), a continuous variable from 1-5;
- 424 • time point (categorical value coded as "baseline", "3 months", "6 months" and "9 months");

425 and the following random effects:

- 426       • site; and  
427       • participant.

428 Deterioration will be measured by the contrast of the "9 month" estimate and the "6 month" estimate.

429

### ***10.6 Consistency of Outcome Results***

430

431 If modeling results appear inconsistent with the summary data then the alternative model specified will also be used,  
432 and both sets of results will be presented to help the study team better understand the results of the study.

433

### ***10.7 Graphical Presentation of Outcome Results***

434 Using the efficacy analysis population, spaghetti plots for proportion of children correctly screened, proportion of  
435 co-morbidities correctly addressed, and number of co-morbidities identified per charge will be plotted for

436 a) site averages; and

437 b) individual participants.

438 Given the number of participants completing the study, results for the individual participants will be plotted  
439 separately for sites with over 8 completers and sites with under 8 completers will be pooled together.

440

441



## 11 SUMMARY OF CHANGES TO THE PROTOCOL AND / OR SAP

- 442 The protocol specified numerous early thoughts on the analysis and the following changes have been made to the  
443 analysis plans:
- 444 a) The primary outcome analysis has been changed as follows:
- 445 • Rather than using ASD patient received / did not receive appropriate co-morbidity management, the  
446 number of correctly treated co-morbidities, among the identified co-morbidities will be used as the outcome  
447 variable, as described in Section 6.3.1.2. This endpoint contains more information than the original yes/no  
448 variable.
  - 449 • Study period is treated as a fixed effect rather than a random effect in the model.
  - 450 • Data from T1, T2, and T3 are used in the primary analysis rather than only T1 and T3, as this should  
451 provide more information.
  - 452 • There is no attempt to quantify the amount of treatment an individual PCP received in the basic modeling  
453 analyses. The amount of treatment (as proportion of sessions completed) will be examined in an  
454 exploratory analysis.
- 455 b) No attempt is being made to incorporate the precise timing of the T2 chart review in the analysis. This is related  
456 to the decision not to attempt to quantify treatment in the primary analysis.
- 457 c) Similarly, we are not planning to use the specific sessions that a PCP attended in the analysis. We are, however,  
458 planning to use the amount of training as a potential predictor in exploratory analyses.
- 459 d) As we are not quantifying the amount of treatment in the primary analysis, no interactions of treatment with other  
460 variables will be considered in the analysis.
- 461 e) No attempt will be made to analyze how the number of ASD patients changes over time. It was recognized while  
462 preparing the SAP that this metric is not an immediate outcome from ECHO AUTISM.
- 463 f) There will be no comparison of results (e.g. satisfaction) across centers, although each site will receive its own  
464 data as a quality improvement measure.
- 465

## 12 OPERATIONAL PROBLEMS DURING THE STUDY AND IMPACT ON THE ANALYSIS

466 As with all clinical studies, various problems arose during the study. Only those that are relevant to the analysis are  
467 mentioned here.

468 a) The initial plan was that each cohort would open early in the start month and have two ECHO clinics each month.  
469 Because of IRB or recruitment issues, two sites started in the month after the scheduled start for their cohort. This is  
470 ignored in the analysis.

471 b) During the study the team learned that Canadian guidelines for screening for ASD were not consistent with US  
472 guidelines. In the primary analysis (Section 10.3.1) PCP screening practice at the Canadian site is included in the  
473 analysis, and screening graded based on consistency with the Canadian guidelines. A sensitivity analysis (Section  
474 10.3.3) excludes the site from the analysis of the screening outcome measure.

475 c) One site withdrew from the ATN during the course of the study. All data collection at the site was completed  
476 before the site withdrew from the network. There was a special data review of all their data to ensure data collection  
477 was complete, which included data post-baseline. No analyses compared results over time during this data review.  
478 Thus, the original SAP was prepared prior to any formal analysis of post-baseline data. The study statistician was  
479 aware of convergence / modeling problems at the time of the revision, but did not have access to data after baseline  
480 or results of the analyses.

481 d) It was originally anticipated that hub coordinators would visit each PCP practice four times, once at each of the  
482 four timepoints. Because of the travel involved, multiple sites requested permission to combine chart reviews so that  
483 fewer visits were needed to clinics. Ultimately, the core team allowed sites to abstract two sets of charts at the same  
484 time (T1 and T2; T3 and T4). The core team decided that this was unlikely to introduce bias into the study as the  
485 period for each of the chart reviews was clear and charts would continue to be available if the site was visited at a  
486 later time.

487 These operational problems are not expected to impact the conclusions from the study.

488

**ECHO AUTISM  
Statistical Analysis Plan  
Amendment 1**

**Amendment 1 to Version 1.01  
Amendment Date: January 20, 2019**

489  
490  
491  
492  
493  
494  
495  
496



497  
498  
499  
500  
501  
502

---

Kristin Sohl, MD  
Thompson Center for Autism and other Neurodevelopmental Disorders,  
University of Missouri  
Study Chair

503  
504  
505  
506

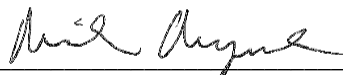

507  
508  
509  
510  
511  
512  
513

---

Micah Mazurek, PhD  
University of Virginia  
Study Co-Chair



514  
515  
516  
517  
518

---

Robert A. Parker, ScD  
MGH Biostatistics Center

519 During preparation of the manuscript two errors were identified by the study team.

520

521 **1. Correction to the Definition of Screening Practice**

522 The original version (from Version 1.1) was:

**6.3.1.1 Screening Practice (co-primary endpoint)**

523 Clinical Practice/Behavior was assessed at T1, T2, T3, and T4 by review of a subset of charts from each PCP's  
524 practice. Four subsets of charts will be reviewed, with a limit of 25 charts in any group. The groups are:

- 525 5. Charts for all children seen for 9-month well-child visits in the 30 days prior to the date of chart review.  
526 6. Charts for all children seen for 18-month well-child visits in the 30 days prior to the date of chart review.  
527 7. Charts for all children seen for 24-month well-child visits in the 30 days prior to the date of chart review.  
528 8. Charts for all children seen for 30-month well-child visits in the 30 days prior to the date of chart review.

529 If more than 25 well-child visits at a specific age are available for chart review, the most recent 25 well-child visits  
530 at a specific age will be reviewed.

531

532 Because of the timing and feasibility of doing all chart-reviews in the 2-week interval between the 6<sup>th</sup> and 7<sup>th</sup> ECHO  
533 clinics, the 30-days was either (a) the 30-days prior to the date of the 7<sup>th</sup> ECHO clinic; or (b) the 30-days prior to the  
534 date of the visit scheduled for chart reviews, if the visit occurred prior to the 7<sup>th</sup> clinic.

535

536 These chart reviews assess the adequacy of screening for each child at each visit. The screening practice is  
537 summarized over the four sets of charts as total number screened appropriately / total number of charts reviewed and  
538 then converted to a percentage.

539

540 For the 9 US sites, adequate screening, as defined by US guidelines consider the use of any general developmental  
541 screening tool as appropriate screening for the 9- and 30-month visits. For the 18- and 24-month visits, an ASD  
542 specific screen must have been used for the child to be considered correctly screened for Autism.

543

544 A different guideline is used in Canada, so that adequate screening was defined differently for the Canadian site.  
545 The recommended screening practice in Canada uses a general developmental screening tool at 12- and 18-month  
546 well-child visits. Only visits at those times were reviewed at the Canadian site, and children were considered  
547 appropriately screened if a general developmental screening tool was administered.

548

549 For analysis purposes, the results of each individual chart reviewed (screened or not screened appropriately) is used  
550 in the analysis rather than the summary over all charts for a PCP.

551

552 PCPs having no well-child visits at baseline would have baseline results imputed if appropriate (Section 8.4.1).

553

554 This section has been replaced with the text below (with changes indicated):

555

**6.3.1.1 Screening Practice (co-primary endpoint)**

556 Clinical Practice/Behavior was assessed at T1, T2, T3, and T4 by review of a subset of charts from each PCP's  
557 practice. Four subsets of charts will be reviewed, with a limit of 25 charts in any group. The groups are:

- 558 1. Charts for all children seen for 9-month well-child visits in the 30 days prior to the date of chart review.  
559 2. Charts for all children seen for 18-month well-child visits in the 30 days prior to the date of chart review.  
560 3. Charts for all children seen for 24-month well-child visits in the 30 days prior to the date of chart review.  
561 4. Charts for all children seen for 30-month well-child visits in the 30 days prior to the date of chart review.

562 If more than 25 well-child visits at a specific age are available for chart review, the most recent 25 well-child visits  
563 at a specific age will be reviewed.

564

565 Because of the timing and feasibility of doing all chart-reviews in the 2-week interval between the 6<sup>th</sup> and 7<sup>th</sup> ECHO  
566 clinics, the 30-days was either (a) the 30-days prior to the date of the 7<sup>th</sup> ECHO clinic; or (b) the 30-days prior to the  
567 date of the visit scheduled for chart reviews, if the visit occurred prior to the 7<sup>th</sup> clinic.

568

569 These chart reviews assess the adequacy of screening for each child at each visit. The screening practice is  
 570 summarized over the four sets of charts as total number screened appropriately / total number of charts reviewed and  
 571 then converted to a percentage.  
 572

573 For the 9 US sites, adequate ASD screening, as defined by US guidelines requires an ASD specific screen at the 18-  
 574 and 24-month visits for the child to be considered correctly screened for Autism. The use of a general developmental  
 575 screen at 9 and 18 months will be a secondary endpoint. The US guidelines specify a general development screening  
 576 at either 24 or 30 months but the study does not have longitudinal data on children. Therefore, the team decided that  
 577 the 24- and 3-month general developmental screening data would not be used.  
 578

579 A different guideline is used in Canada, so that adequate screening was defined differently for the Canadian site.  
 580 The recommended screening practice in Canada uses a general developmental screening tool at 12- and 18-month  
 581 well-child visits. Only visits at those times were reviewed at the Canadian site, and children were considered  
 582 appropriately screened if a general developmental screening tool was administered.  
 583

584 The Canadian data is included only in the analysis of the secondary endpoint of general developmental screening at  
 585 9 (or 12) and 18 months.  
 586

587 For analysis purposes, the results of each individual chart reviewed (screened or not screened appropriately) is used  
 588 in the analysis rather than the summary over all charts for a PCP.  
 589

590 PCPs having no well-child visits at baseline would have baseline results imputed if appropriate (Section 8.4.1).  
 591

## 592 **2. Need for Missing Data Imputation of Baseline Values**

593 The basic model in Section 10.3.1 did not use baseline value as a predictor, and therefore imputation of baseline  
 594 values was not needed for the analysis. As such, the following section is removed from the SAP:  
 595

### 8.4.1 Imputing Missing Data for Baseline Measures

596 Since baseline values are included in the basic modeling analysis of the study (Section 10.3), baseline data for a  
 597 primary outcome measure (listed in Section 6.3.1) for a PCP will be imputed using multiple imputation if there is  
 598 data at three- and six-months for the outcome measure for that PCP.

599 Such missing data would occur if there are no well-child visits or no ASD child visits at baseline for a PCP.

600 Imputation for a primary outcome will only be done if it allows us to include at least 5% more individuals in the  
 601 analysis for a primary outcome measure. Several PCPs had very low volume offices, so that before embarking on  
 602 multiple imputation we are requiring that there be sufficient information to be gained to make the additional  
 603 complexity worthwhile.

604 Data will be imputed from the distribution of site specific values of the baseline data. Imputation will not be done  
 605 for other measures.  
 606

## 607 **3. Additional Changes**

608 Because of the change in the definition of screening practice Section 10.3.2 is removed from the SAP. This text is  
 609 included for completeness:  
 610

### 10.3.2 Sensitivity Efficacy Analyses

611 Because of differences in screening practices at one site, the primary efficacy analysis of screening will be repeated  
 612 with the data from this site removed to ensure robustness of conclusions.  
 613

614  
615  
616  
617  
618  
619

**ECHO AUTISM**  
**Statistical Analysis Plan: Amendment 2**

Amendment date: November 25, 2019



620  
621  
622  
623  
624  
625

---

Kristin Sohl, MD  
University of Missouri  
Study Chair

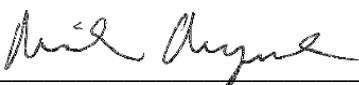

626  
627  
628  
629  
630  
631  
632  
633  
634  
635

---

Micah Mazurek, PhD  
University of Virginia  
Study Co-Chair



636  
637  
638  
639

---

Robert A. Parker, ScD  
MGH Biostatistics Center

640 During preparation of a revision to the manuscript the team re-examined the basic model used  
 641 for the analysis to ensure that it was adequately adjusting for time, as a referee had raised  
 642 multiple questions about the analysis and expressed skepticism that a) our model was adequately  
 643 adjusting for potential time factors and b) that the primary analysis should be the modified ITT  
 644 population, not the completer population originally used.  
 645 Because of this the team prepared simulations to demonstrate to the reviewer that the analysis  
 646 did appropriate adjustments for time trends. During this work it was discovered that the reviewer  
 647 was indeed correct and that we had failed to adjust for time trends appropriately in the analysis.  
 648 As such, the primary analysis was changed. This led to two changes in the SAP:

## 649 **1. Change in Population and Model**

650 The original text was:

### 651 **10.3 Efficacy Analyses**

#### 652 **10.3.1 Primary Efficacy Analyses**

653 The primary efficacy analysis will be done in the completer population.

654 After imputation of missing data as described in Section 8.4, a generalized linear mixed  
 655 model analysis will be used to predict the outcome (listed in Section 10.1, with details of  
 656 how each variable is calculated and baseline is calculated) with the following fixed  
 657 effects:

- 658 • period (cohort), a continuous variable from 1-5;
- 659 • time point (treated both as categorical variables [coded as "baseline", "3 months"  
 660 and "6 months"] and as a continuous variable [coded as 0, 0.5, 1.0]; see below);

661 and the following random effects:

- 662 • site; and
- 663 • participant.

664 After the initial analysis, a final decision will be made as to whether the effect of time  
 665 point should be treated as a categorical or a continuous variable. If the results suggest  
 666 that there is a substantial benefit to treating time point as a categorical variable in at least  
 667 one of the two co-primary outcome measures, then it will be retained as a categorical  
 668 variable for all outcome measures; otherwise it will be treated as a continuous variable.  
 669 For the purposes of this analysis, a substantial benefit is defined as a statistically  
 670 significant improvement using a likelihood ratio test when time is treated as a categorical  
 671 variable rather than a continuous variable. The decision in the primary efficacy analysis  
 672 will be used in all other analyses.

673 Technical note: This model will use PROC GLIMMIX, and two random statements, one  
 674 fitting a random intercept for site (RANDOM SITE) and one fitting a random intercept  
 675 for PCP (RANDOM /subject = PCP). Note that although multiple imputation (PROC  
 676 MIANALYZE) should work with PROC GLIMMIX results, there are reports of  
 677 computational problems arising. Should such problems arise in the analysis of the data  
 678 from the study, the use of multiple imputation will be reconsidered.

679 and has been modified to:

### 680 **10.3 Efficacy Analyses**

#### 681 **10.3.1 Primary Efficacy Analyses**

682 The primary efficacy analysis will be done in the modified ITT population

683 After imputation of missing data as described in section 8.4, a generalized linear mixed  
684 model analysis will be used to predict the outcome (listed in Section 10.1, with details of  
685 how each variable is calculated and baseline is calculated) with the following fixed  
686 effects:

- 687 • period, a categorical variable from 1-8;
- 688 • time point (treated both as categorical variables [coded as baseline, 3, 6, or 9  
689 months] and as a continuous variable [coded as 0.5, 1.0]; see below); and

690 and the following random effects:

- 691 • site, as a random effect; and
- 692 • participant, as a random effect within site.

693

## 694 **2. Deletion of An Additional Analysis**

695 Based on the change in population and reviewer comments, this section of the SAP was  
696 removed:

### 697 **10.4 Effectiveness Analysis**

698 The effectiveness analysis will repeat the efficacy analysis (Section 10.3) for the total  
699 population.

700

701
